# Supplementary material for: Expansion of interferon inducible gene pool via USP18 inhibition promotes cancer cell pyroptosis
Source: Springer Nature journal article supplement (doi:10.1038/s41467-022-35348-5), 2023-01-17
Supplement: MOESM1 [file 41467_2022_35348_MOESM1_ESM.pdf]

# **Expansion of interferon inducible gene pool via USP18 inhibition promotes cancer cell pyroptosis**

**Kei-ichiro Arimoto<sup>1</sup>, Sayuri Miyauchi<sup>1</sup>, Ty D. Troutman<sup>2</sup>, Yue Zhang<sup>3</sup>, Mengdan Liu<sup>3</sup>, Samuel A. Stoner<sup>1</sup>, Amanda G. Davis<sup>1</sup>, Jun-Bao Fan<sup>1</sup>, Yi-Jou Huang<sup>3</sup>, Ming Yan<sup>1</sup>, Christopher K. Glass<sup>2,4</sup>, and Dong-Er Zhang<sup>1,5\*</sup>**

<sup>1</sup>Moore's UCSD Cancer Center, University of California San Diego, La Jolla, USA

<sup>2</sup>Department of Medicine, University of California San Diego, La Jolla, USA

<sup>3</sup>Division of Biological Sciences, University of California San Diego, La Jolla, USA

<sup>4</sup>Department of Cellular and Molecular Medicine, University of California San Diego, La Jolla, USA

<sup>5</sup>Department of Pathology, University of California San Diego, La Jolla, USA

\*Correspondence: [d7zhang@health.ucsd.edu](mailto:d7zhang@health.ucsd.edu)

## **Supplementary Information**

Supplementary Fig.1

Supplementary Fig.2

Supplementary Fig.3

Supplementary Fig.4

Supplementary Fig.5

Supplementary Fig.6

Supplementary Fig.7

Supplementary Fig.8

Supplementary Fig.9

Supplementary Fig.10

Supplementary Fig.11

Supplementary Fig.12

Supplementary Table 1

Supplementary Table 2

Supplementary Table 3

Supplementary Table 4

Supplementary Table 5

Supplementary Table 6

Supplementary Figure.1 (Arimoto et al)

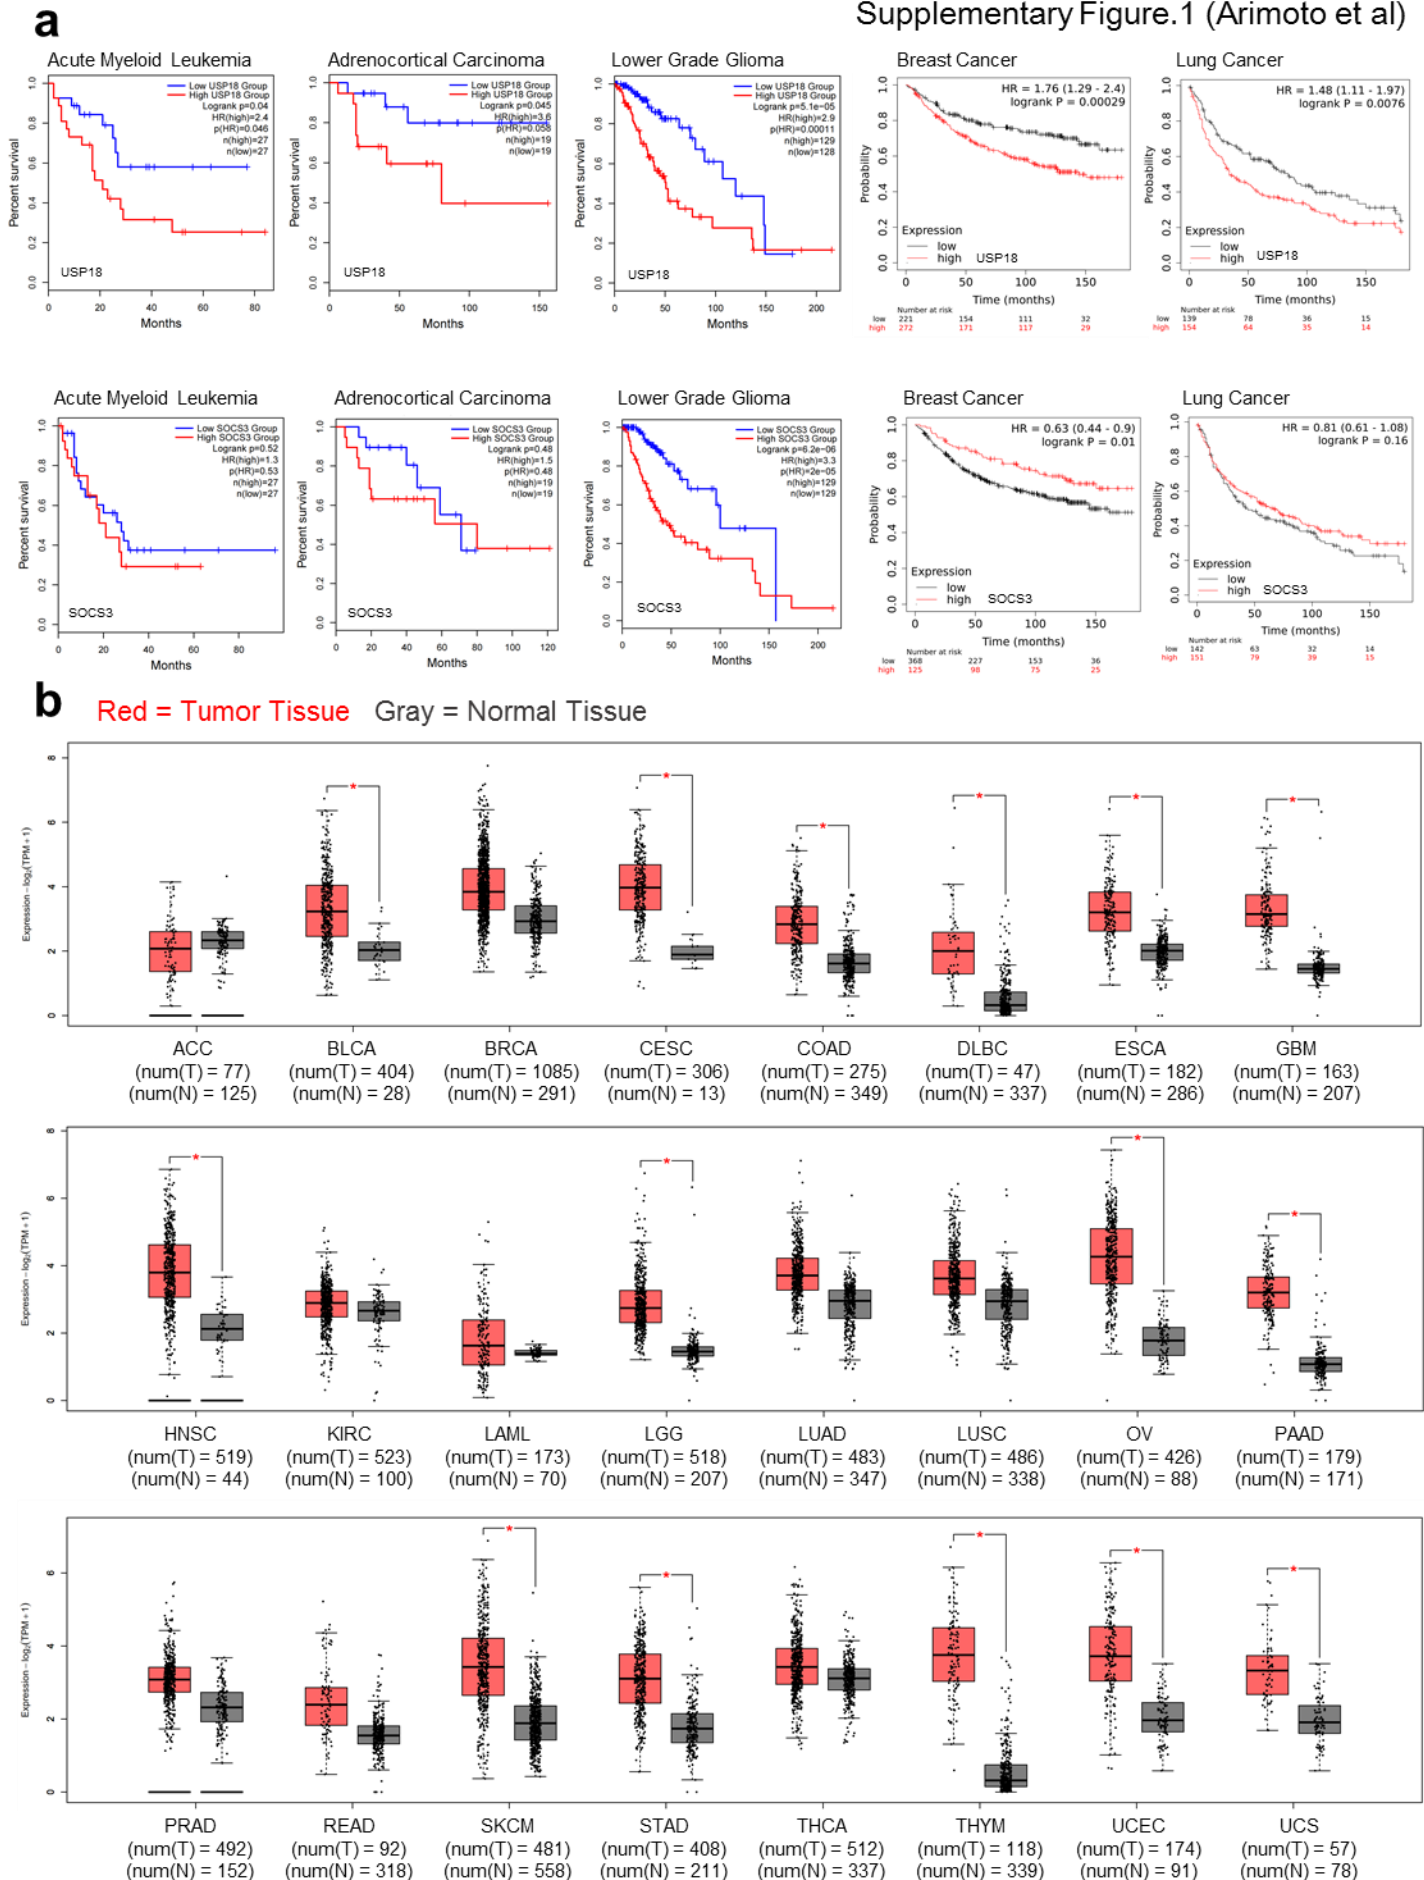

**Supplementary Fig. 1.**

**USP18 expression and associated clinical outcomes**

a; Kaplan Meier survival curves for USP18 (*Top*) and SOCS3 (*Bottom*) of the indicated TCGA datasets: KmPlot analysis for Breast Cancer and Lung cancer. HR: Hazard Ratio

b; USP18 expression in numerous cancers compared to normal tissue from GEPIA2 data set including GTEx and TCGA data. Expression (*Y*-axis) is derived from RNA-seq on Log2 scale. Boxplot center represents median, bounds represent 25 and 75%, and whiskers show the minimum or maximum no further than 1.5 times interquartile range from the bound. *p* value was determined by one-way ANOVA. \* shows *p*-value < 0.05.

Supplementary Figure.2 (Arimoto et al)

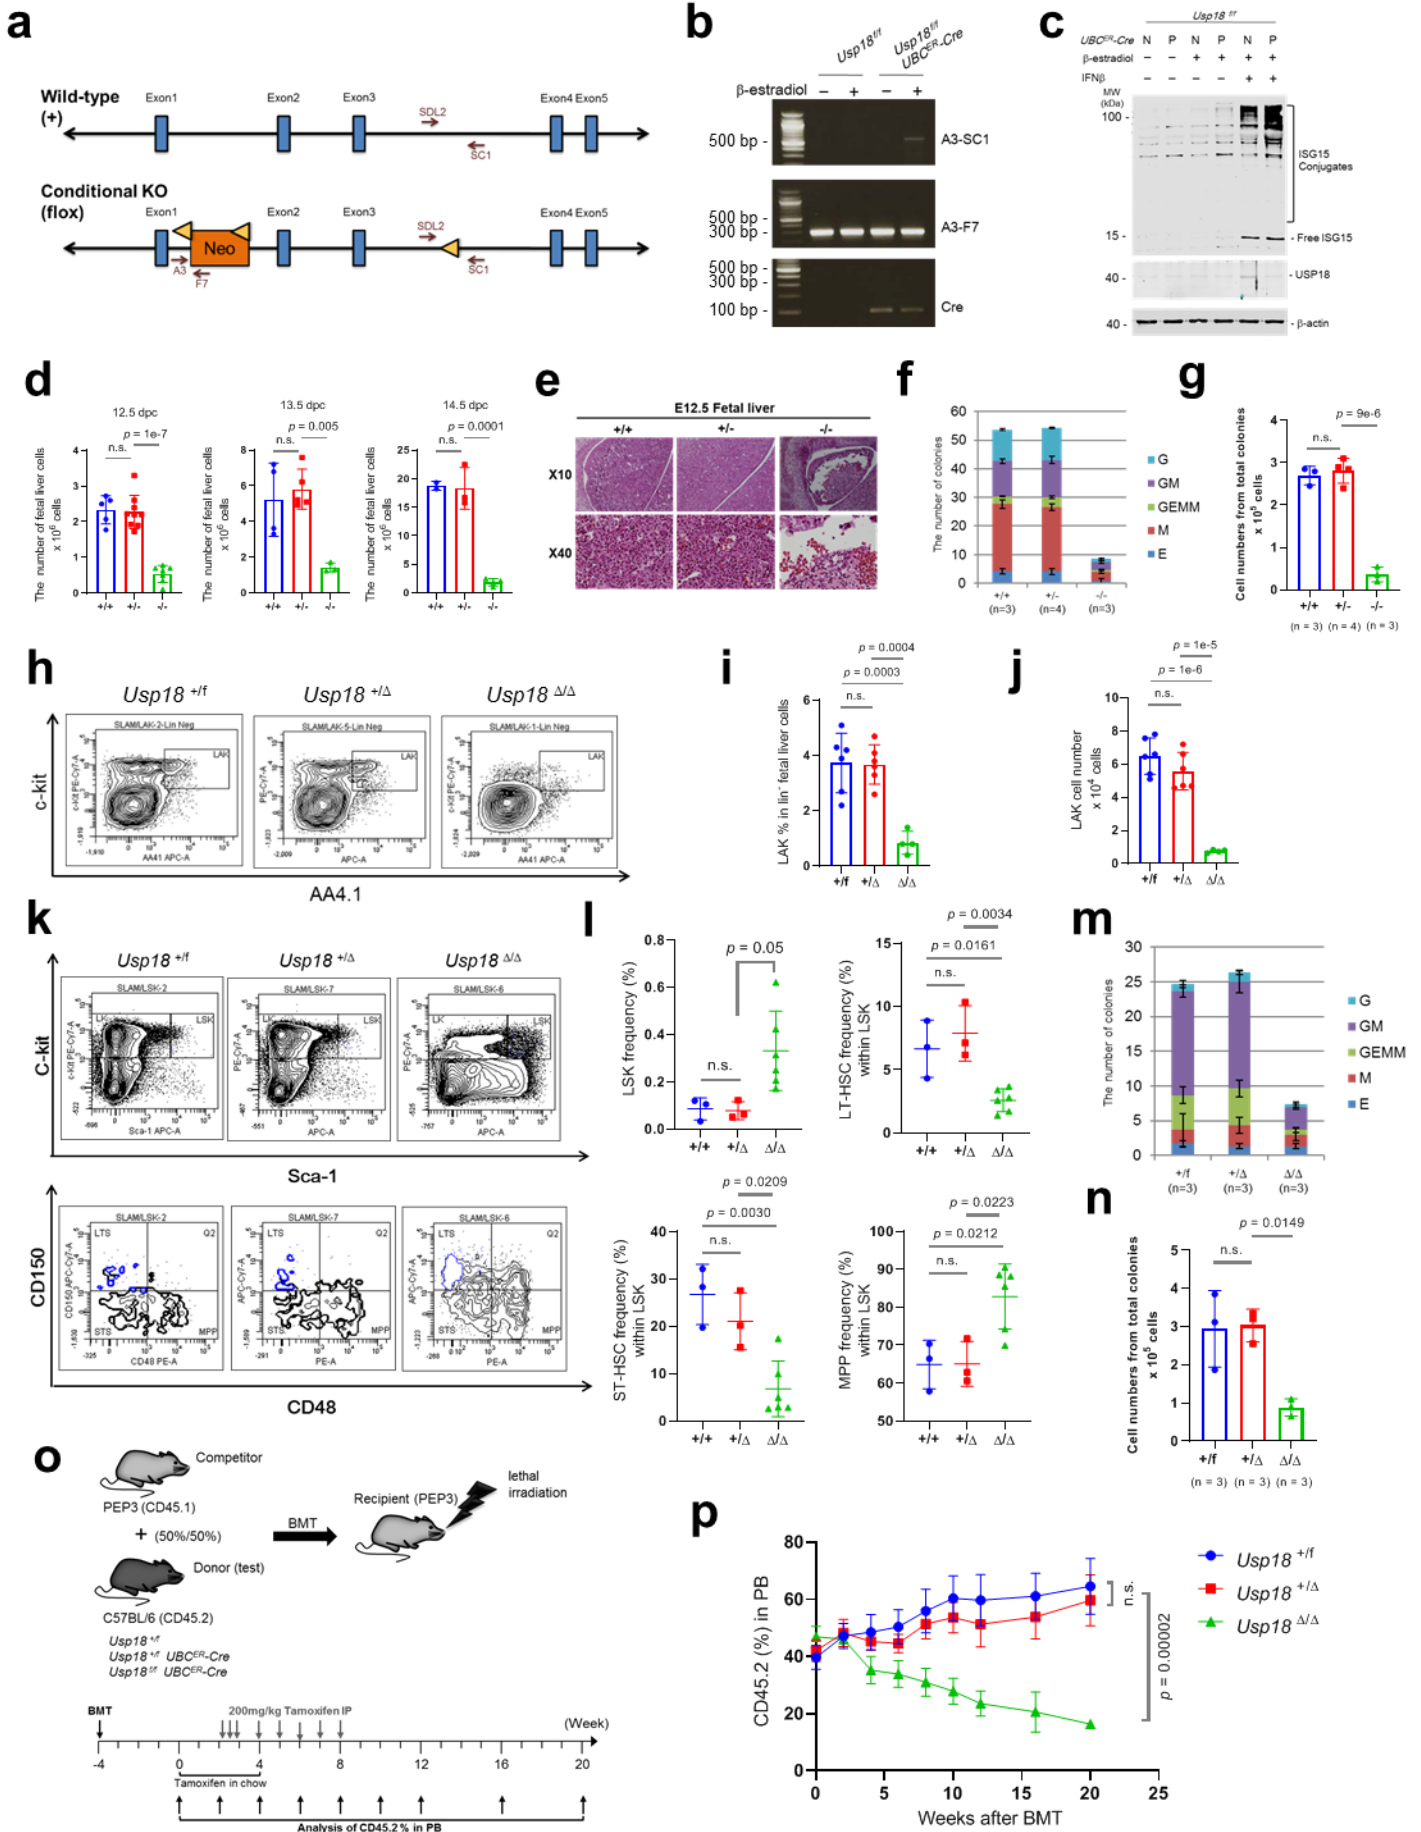

**Supplementary Fig. 2.**

**Two alleles of *Usp18* is required for normal HSC maintenance.**

- a; Schematic of the strategy for conditional *Usp18* deletion.
- b; Verification of the *Usp18* deletion in *Usp18<sup>flf</sup>* conditional KO by genotyping PCR.
- c; Verification of the USP18 deletion in *Usp18<sup>flf</sup>* conditional KO bone marrow cells by western blot.
- d; Quantification of fetal liver cells in WT, *Usp18<sup>+/-</sup>* and *Usp18<sup>-/-</sup>* mice (E12.5: +/+, +/-, -/-, n = 5, 9, 7, E13.5: n = 4, 5, 3, E14.5: n = 2, 3, 4).
- e; Representative hematoxylin-Eosin (HE) staining for WT, *Usp18<sup>+/-</sup>* and *Usp18<sup>-/-</sup>* fetal liver at E12.5.
- f; Colony assay for WT (n = 3), *Usp18<sup>+/-</sup>* (n = 4) and *Usp18<sup>-/-</sup>* (n = 3) total fetal livers at E12.5.
- g; Quantification of total cell number from fetal liver derived colonies of (f).
- h; Representative FACS plot of LAK (Lin<sup>-</sup> AA4.1<sup>+</sup> c-Kit<sup>+</sup>) for *Usp18<sup>+/f</sup>* (+/f) (n = 6), *Usp18<sup>+/f</sup>* Vav-iCre (+/Δ) (n = 6), and *Usp18<sup>flf</sup>* Vav-iCre (Δ/Δ) (n = 4) fetal liver cells.
- i; The frequencies of LAK cells for (h).
- j; The absolute number of LAK cells for (h).
- k; Representative FACS plot of HSCs from *Usp18<sup>+/f</sup>*, *Usp18<sup>+/Δ</sup>* and *Usp18<sup>Δ/Δ</sup>* 8 weeks old mice.
- l; The frequencies of LSK, and the frequencies of LT-HSC, ST-HSC and MPP within LSK cells in bone marrow cells from *Usp18<sup>+/f</sup>* (n = 3), *Usp18<sup>+/Δ</sup>* (n = 3) and *Usp18<sup>Δ/Δ</sup>* (n = 6) mice.
- m; Colony assay for BM LT-HSC of *Usp18<sup>+/f</sup>* (n = 3), *Usp18<sup>+/Δ</sup>* (n = 3) and *Usp18<sup>Δ/Δ</sup>* (n = 3) mice.
- n; Quantification of total cell number from derived colonies of (m).
- o; Competitive bone marrow transplantation experimental schematic. Bone marrow cells from PEP3 (CD45.1) competitor and C57BL/6 (CD45.2) background *Usp18<sup>+/f</sup>* (n = 4), *Usp18<sup>+/f</sup>* *UBC<sup>ER</sup>-Cre* (n = 4) or *Usp18<sup>flf</sup>* *UBC<sup>ER</sup>-Cre* (n = 5) mice was mixed as 50%:50%, followed by transplanted to recipient PEP3 mice.
- p; Contribution of CD45.2-expressing (donor) cells to PB in reconstituted mice for (o).

All *p*-values were determined by one-way ANOVA test. All data represent mean ± s.d, except where indicated. n.s. Source data are provided as a Source Data file.

**a**

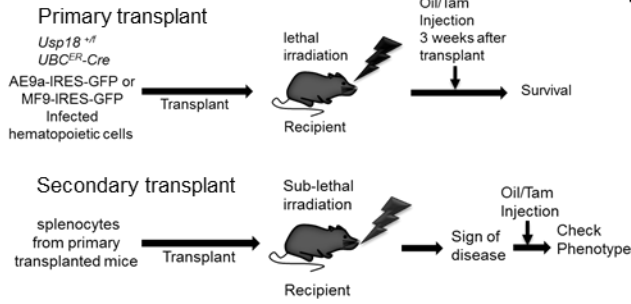

**b**

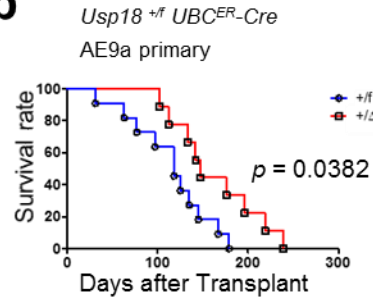

**c**

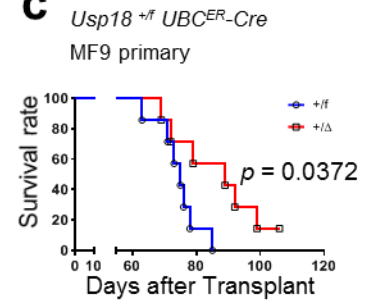

**d**

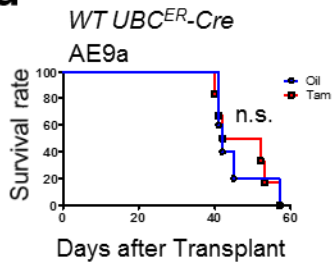

**e**

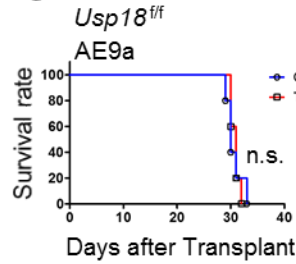

**f**

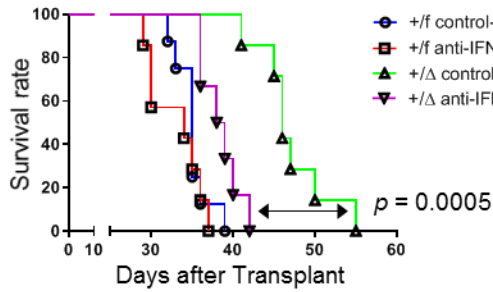

**g**

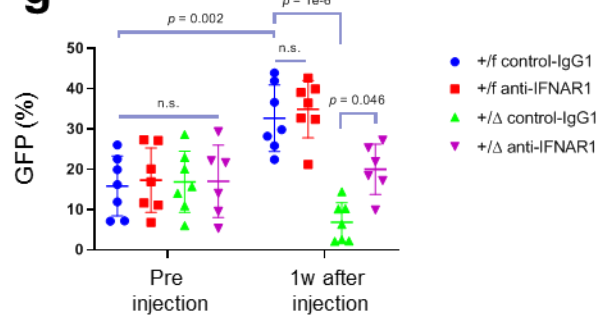

**h**

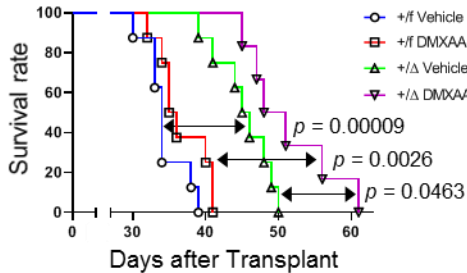

**i**

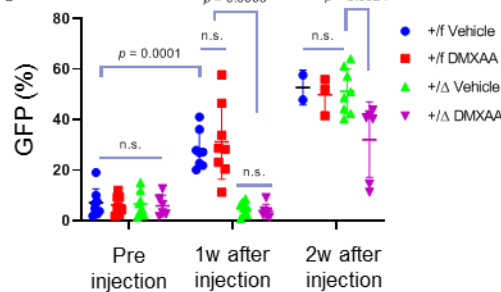

**j**

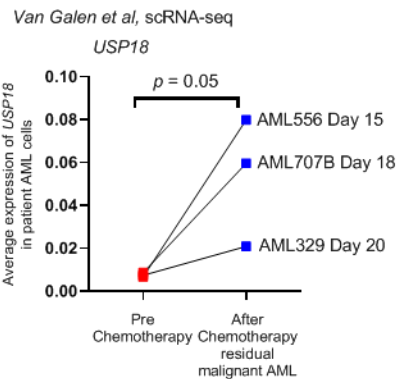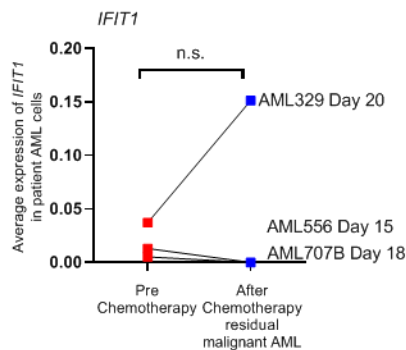

**k**

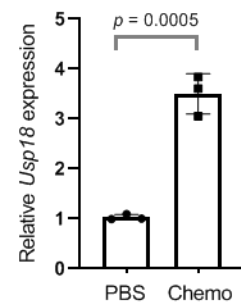

### Supplementary Fig. 3.

#### Inducible *Usp18* deletion delays cancer development in mouse models

a; Schematic strategy for heterozygous deletion of *Usp18* in leukemia primary and secondary transplantation mouse models.

b; *Usp18<sup>+/-</sup> UBC<sup>ER</sup>-Cre* fetal liver cells were infected with MSCV-IRES-GFP AE9a retrovirus and transplanted (i.v.) into lethally irradiated recipient mice. Three weeks after transplantation, oil or tamoxifen was injected (i.p.) daily for 5 days (Oil (+/f) n = 10, Tam (+/Δ) n = 9).

c; Same procedure as (a) using MSCV-IRES-GFP MLL-AF9 retrovirus (+/f n = 7, +/Δ n = 7).

d; Survival of sub-lethally irradiated recipient mice transplanted with WT *UBC<sup>ER</sup>-Cre* AE9a GFP splenocytes from primary bone marrow transplanted mice (n = 5 mice each). After confirming that the mice become sick, oil or tamoxifen was injected 5 times.

e; Same procedure as (d) using *Usp18<sup>fl/fl</sup>* AE9a GFP splenocytes (n = 5 mice each).

f; Survival for recipients of *Usp18<sup>+/-</sup> or +/Δ UBC<sup>ER</sup>-Cre* AE9a GFP AMLs with once control IgG1 or anti-IFNAR1 antibody injection (i.v.). (+/f /control IgG1 n = 7, +/f /anti-IFNAR1 n = 7, +/Δ/control IgG1 n = 7, +/Δ/anti-IFNAR1 n = 6).

g; The percentage of GFP+ cells in the PB from (f) were analyzed before and 1 week after oil or tamoxifen injection.

h; Survival for recipients of *Usp18<sup>+/-</sup> or +/Δ UBC<sup>ER</sup>-Cre* AE9a-GFP AMLs with once vehicle or DMXAA injection (i.v.). (+/f/vehicle n = 8, +/f/DMXAA n = 8, +/Δ/vehicle n = 8, +/Δ/DMXAA n = 6).

i; GFP % of (h) in PB were analyzed.

j; scRNA-seq of three AML patients who had been given standard chemotherapy were analyzed. The average expressions of *USP18* and *IFIT1* in AMLs pre- and post-chemotherapy (~ Day 20) are shown.

k; Soon after PBS or chemotherapy were given to AE9a GFP AML bearing mice, GFP+ cells were sorted and the expression of *Usp18* was analyzed by qRT-PCR.

*p*-value for all survival analysis in Supplementary Fig.3 was determined by log-rank test.

One-way ANOVA test for Supplementary Fig.3g, i, two-tailed Student *t*-test for Supplementary Fig.3j-k were used for *p*-values. All data represent mean ± s.d, except where indicated. n.s. = not statistically significant. Source data are provided as a Source Data file.

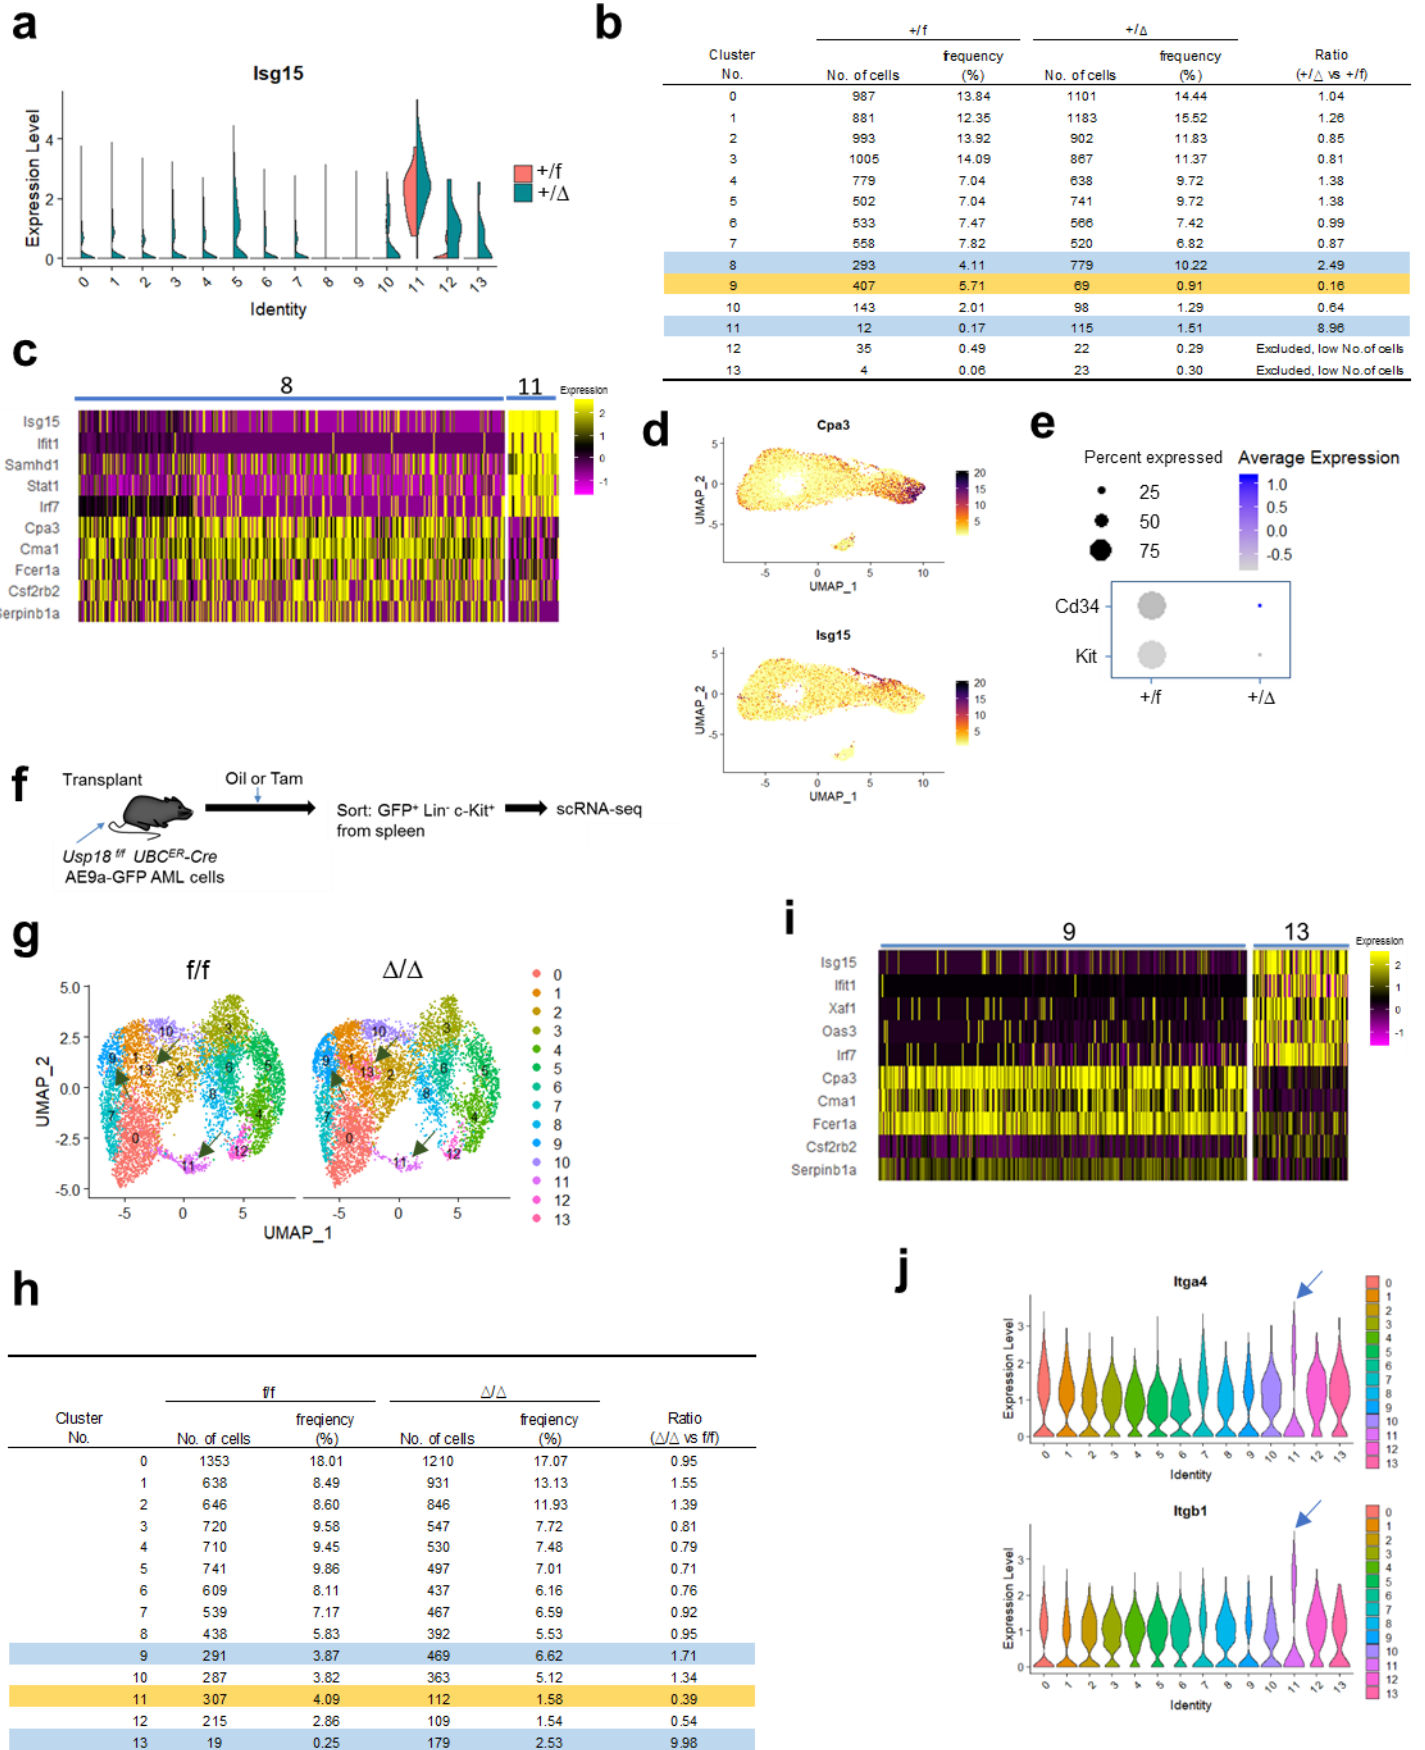



**Supplementary Fig. 4.**

**Single cell RNA-seq analysis of *Usp18<sup>+/f</sup>* and *Usp18<sup>+Δ</sup>* or *Usp18<sup>f/f</sup>* and *Usp18<sup>Δ/Δ</sup>* AE9a recipient mice**

a; Violin plots of *Isg15* expression in all clusters with or without *Usp18* suppression in scRNA seq analysis of *Usp18<sup>+/f</sup>* and *Usp18<sup>+Δ</sup>*.

b; Table displaying the number of cells in each cluster, frequency among all clusters, and ratio describing changes in cluster frequencies between the two groups of mice (+/f vs +/Δ).

c; Heatmap of phenotypic gene expression in clusters 8 and 11 in scRNA seq analysis of *Usp18<sup>+/f</sup>* and *Usp18<sup>+Δ</sup>*.

d; Feature plots for representative genes in clusters 8 and 11 in scRNA seq analysis of *Usp18<sup>+/f</sup>* and *Usp18<sup>+Δ</sup>*.

e; Dot plot of Cd34 and Kit expression in cluster 9 before and after *Usp18* deletion in scRNA seq analysis of *Usp18<sup>+/f</sup>* and *Usp18<sup>+Δ</sup>*.

f; Single cell RNA-seq of GFP<sup>+</sup>Lin<sup>-</sup>c-Kit<sup>+</sup> cells from *Usp18<sup>f/f</sup>* and *Usp18<sup>Δ/Δ</sup>* AE9a recipient mice (*Usp18<sup>f/f</sup>* n = 3, *Usp18<sup>Δ/Δ</sup>* n = 3 mice each pooled).

g; UMAP of sorted GFP<sup>+</sup>Lin<sup>-</sup>c-Kit<sup>+</sup> cells from *Usp18<sup>f/f</sup>* and *Usp18<sup>Δ/Δ</sup>* AE9a recipient mice. Arrows indicates clusters 9, 11 and 13.

h; Table displaying the number of cells in each cluster, frequency among all clusters, and ratio describing changes in cluster frequencies between the two groups of mice (f/f vs Δ/Δ).

i; Heatmap of phenotypic gene expression in clusters 9 and 13 in scRNA seq analysis of *Usp18<sup>f/f</sup>* and *Usp18<sup>Δ/Δ</sup>*.

j; Violin plots for *Itga4* and *Itgb1* in all clusters.

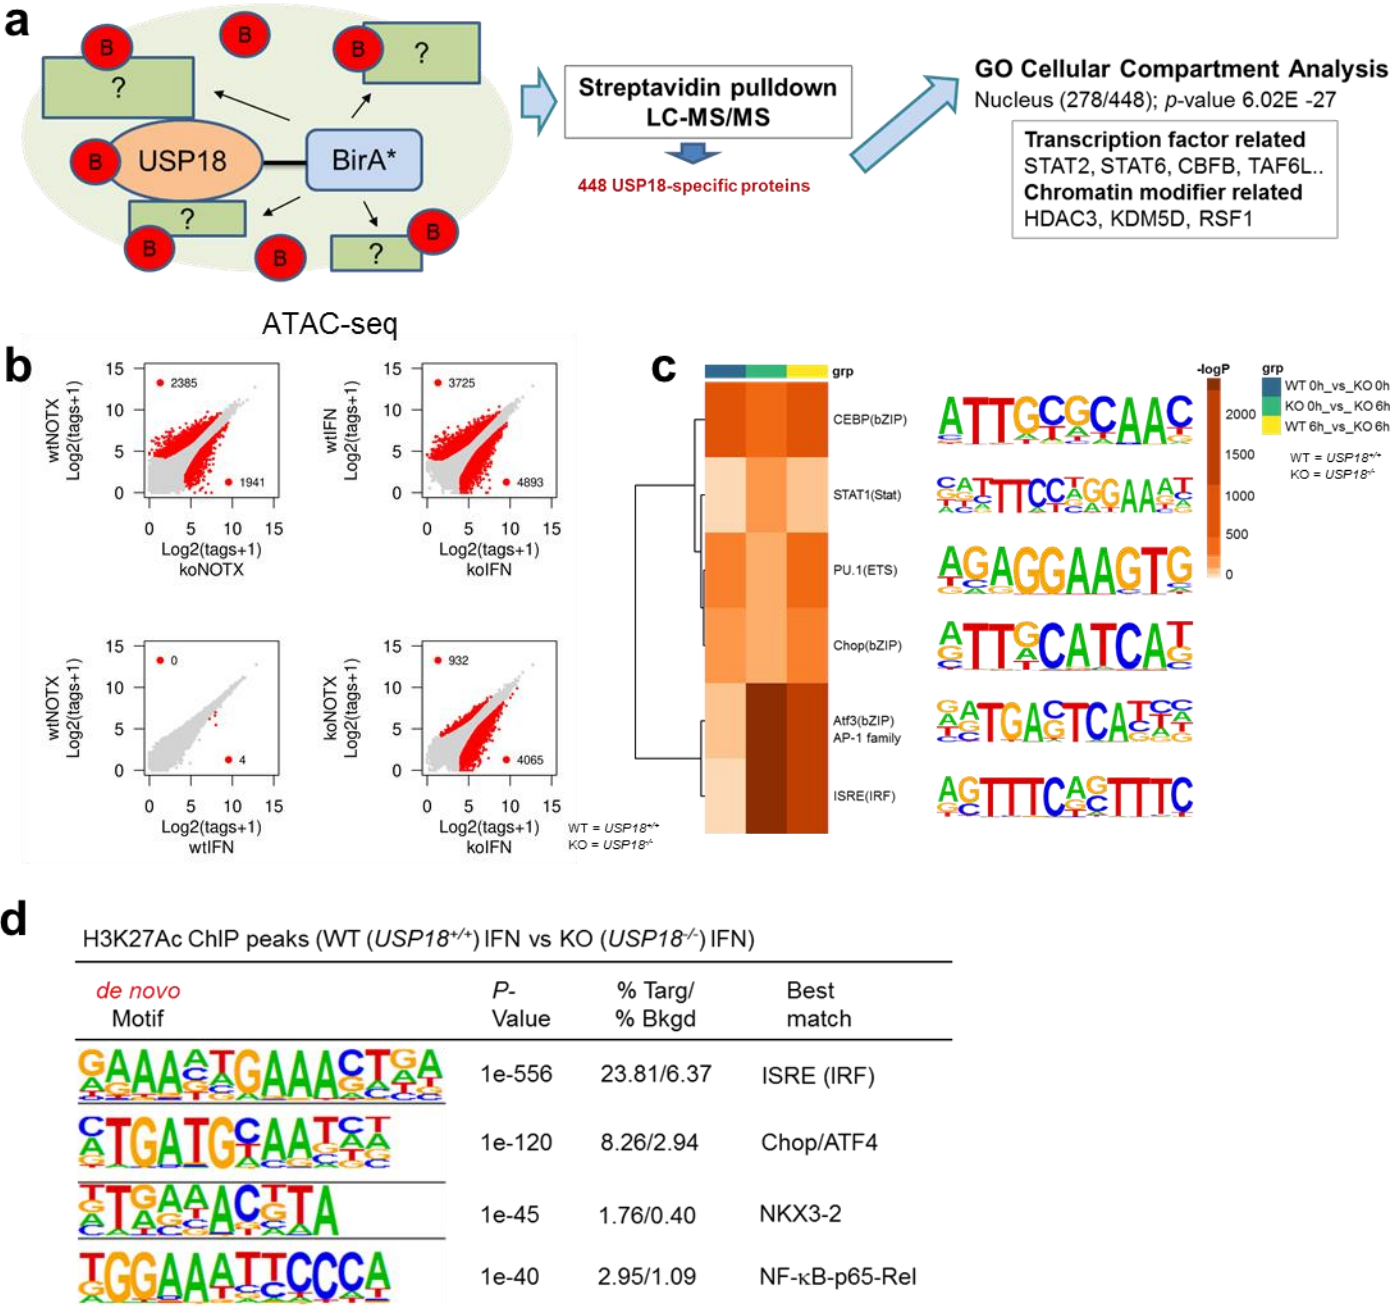

**Supplementary Fig. 5**  
**Nuclear USP18 plays a role in ISG expansion**

a; Schematic of the strategy for performing proximity-based biotin labeling in the U5A cell line. Three independent replicates were submitted for mass-spectrometric analysis and 408 unique, high-confidence USP18-proximal proteins were identified. Gene Ontology (GO) cellular compartment analysis was performed on this group of proteins.

b; Scatter plot of ATAC tag counts at genomic regions marked by significant ATAC in WT vs *USP18*<sup>-/-</sup>, WT vs WT IFN, WT IFN vs *USP18*<sup>-/-</sup> IFN, and *USP18*<sup>-/-</sup> vs *USP18*<sup>-/-</sup> IFN THP-1

cells. Red data points refer to peaks with >2-fold change.

c; Comparative motif enrichment defined by ATAC-seq in the comparison from (b). *p*-value was determined by two-tailed Hypergeometric test adjusted with Benjamini-Hochberg approach.

d; Top 4 *de novo* motifs at enhancer regions defined by differential H3K27ac (WT IFN vs *USP18*<sup>-/-</sup> IFN). *p*-value was determined by two-tailed Hypergeometric test adjusted with Benjamini-Hochberg approach.

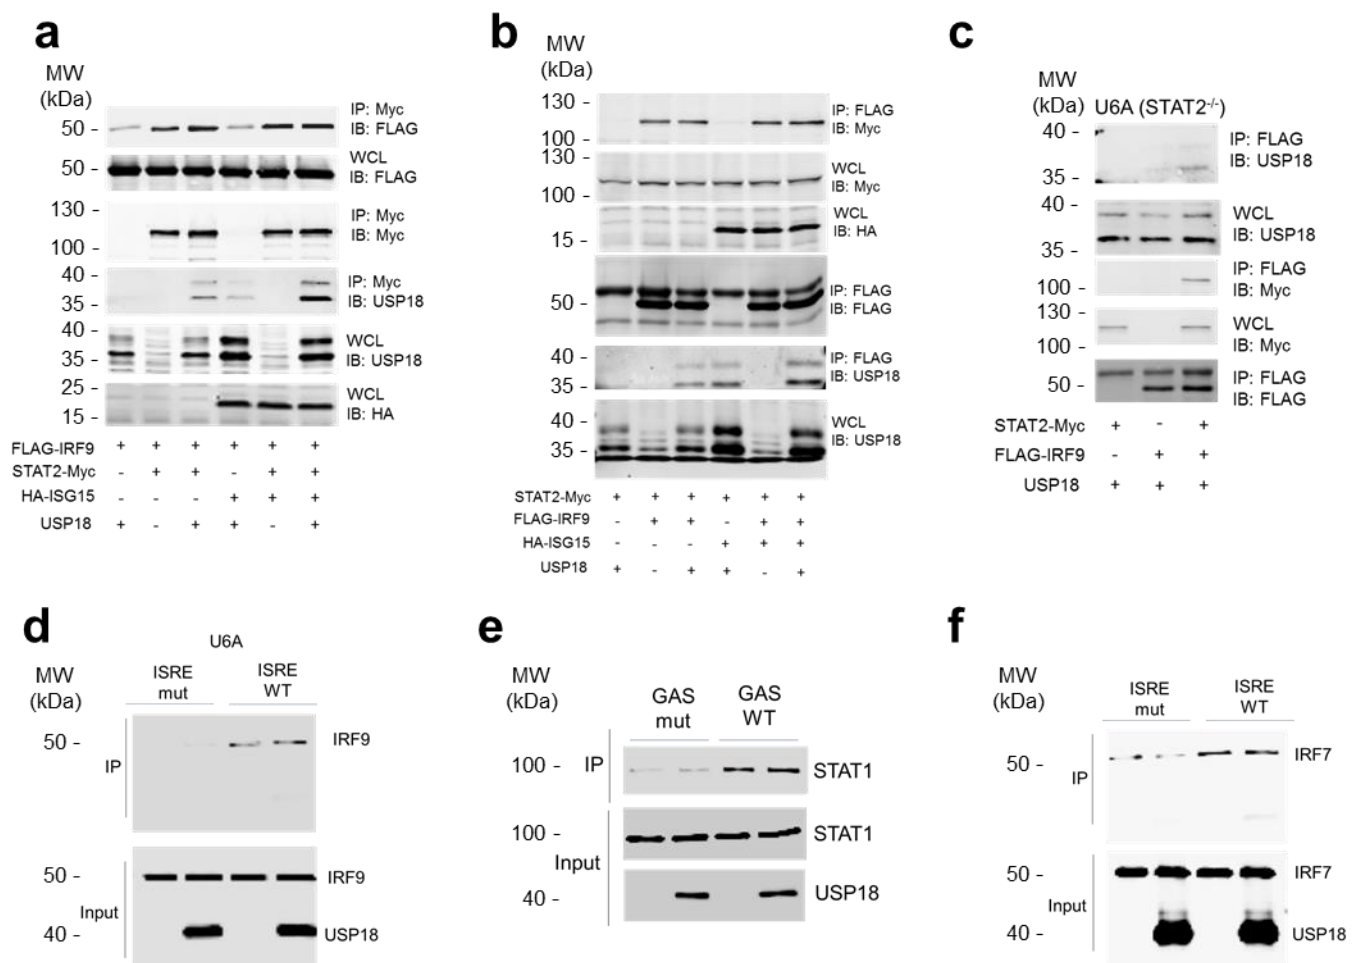

Supplementary Fig. 6

**USP18 inhibits ISRE or IRE-IRF9 binding in a STAT2 dependent manner**

a; 293T cells were transfected with plasmids encoding FLAG-IRF9, STAT2-Myc, HA-ISG15, and USP18 as indicated. Cell lysates were immunoprecipitated with anti-Myc antibody and immunoblotted with FLAG, Myc, and USP18 antibodies. Whole cell lysates were also analyzed with FLAG, USP18, and HA antibodies.

b; 293T cells were transfected with plasmids encoding FLAG-IRF9, STAT2-Myc, HA-ISG15, and USP18 as indicated. Cell lysates were immunoprecipitated with anti-FLAG antibody and immunoblotted with FLAG, Myc, and USP18 antibodies. Whole cell lysates were also analyzed with Myc, USP18, and HA antibodies.

c; U6A cells were transfected with plasmids encoding FLAG-IRF9, STAT2-Myc, and USP18 as indicated. Cell lysates were immunoprecipitated with anti-FLAG antibody and immunoblotted with FLAG, Myc, and USP18 antibodies. Whole cell lysates were also analyzed with Myc, and USP18 antibodies.

d; DNA pulldown assay in U6A cells. ISRE-IRF9 binding was not affected by USP18 expression.

e; DNA pulldown assay. GAS-STAT1 binding was not affected by USP18 expression.

f; DNA pulldown assay. ISRE-IRF7 binding was not affected by USP18 expression.

Source data are provided as a Source Data file.

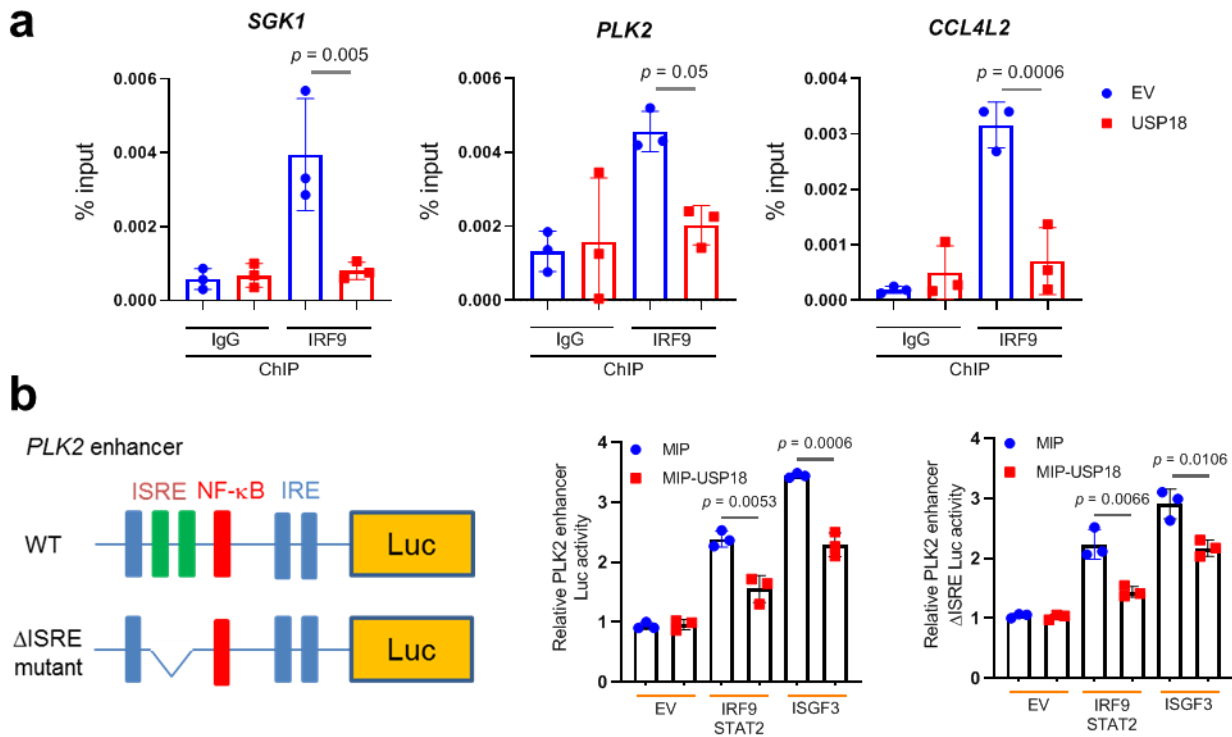**Supplementary Fig. 7****USP18 regulates enhancer activity of hidden atypical ISGs and non-canonical atypical ISGs**

a; IRF9 ChIP qPCR for *SGK1*, *PLK2*, and *CCL4L2* in empty vector (EV) or USP18 expressing THP-1 cells.  $n = 3$  independent samples.  $p$ -value was determined by one-way ANOVA test.

b; Relative firefly to renilla luciferase activity in U5A (*IFNAR2*<sup>-/-</sup>) cells transfected with the indicated luciferase reporter construct with or without USP18 co-expression.  $n = 3$  independent samples.  $p$ -value was determined by one-way ANOVA test.

All data represent mean  $\pm$  s.d.

Source data are provided as a Source Data file.

Supplementary Figure 8 (Arimoto et al)

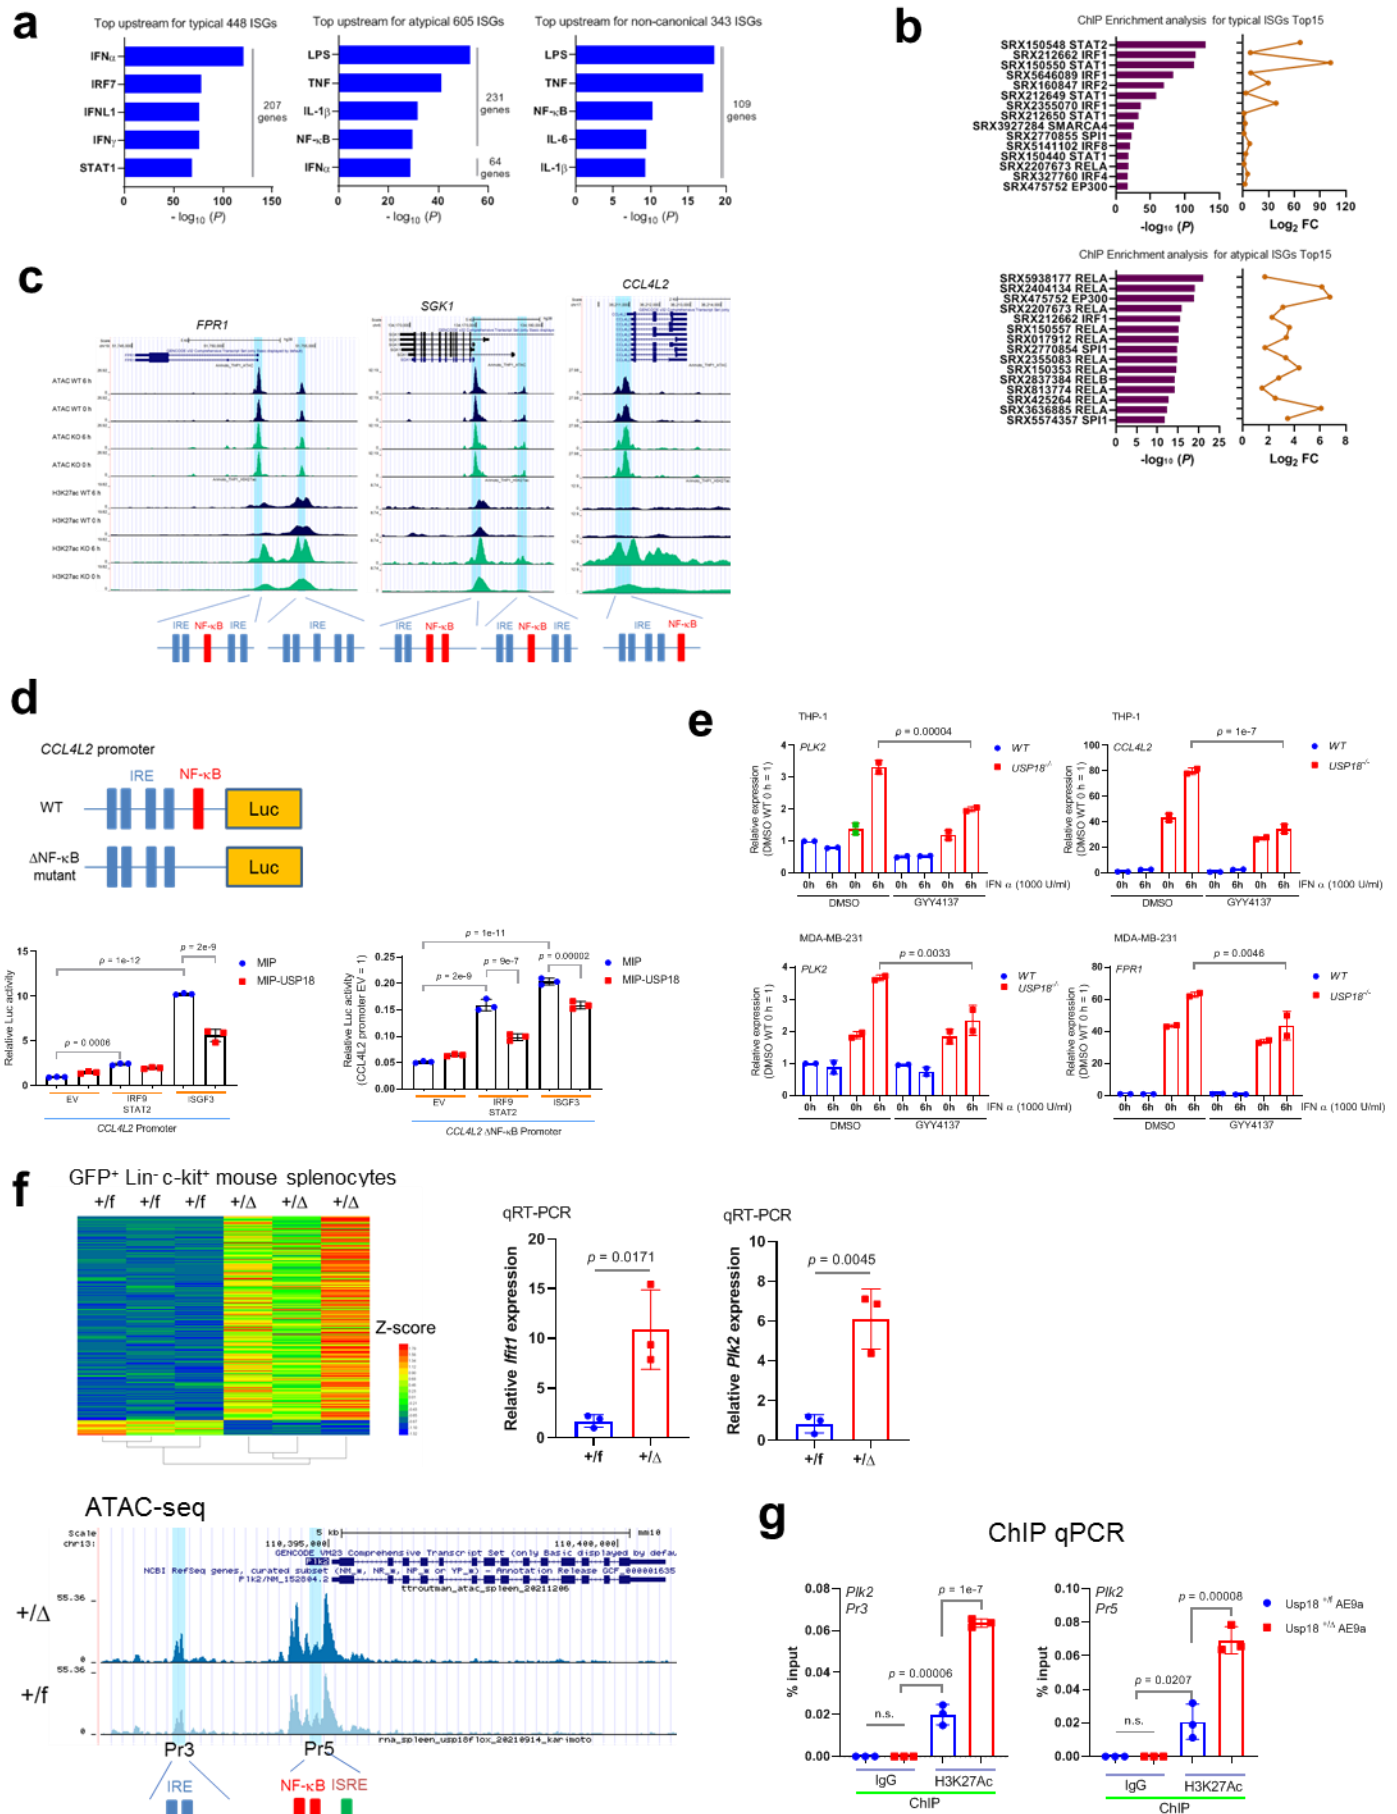

## Supplementary Fig. 8

### NF- $\kappa$ B (p65) is involved in the induction of atypical ISGs

a; IPA upstream analysis of typical, atypical, and non-canonical ISGs. *p*-value was determined by right-tailed Fisher's exact test adjusted with Benjamini-Hochberg approach.

b; ChIP-Atlas Enrichment analysis for typical and atypical ISGs. *p*-value was determined by two-tailed Fisher's exact probability test adjusted with Benjamini-Hochberg approach.

c; Genome browser tracks depicting ATAC and H3K27ac peaks in *CCL4L2*, *SGK1*, and *FPR1*.

d; Relative firefly to renilla luciferase activity in cells co-transfected with the indicated *CCL4L2* promoter luciferase construct and the indicated combinations of IRF9, STAT2, p65, and USP18. *p*-value was determined by one-way ANOVA test.

e; qRT-PCR analysis of *PLK2* and *CCL4L2* expression in parental or *USP18*<sup>-/-</sup> THP-1 cells with the indicated combination of IFN, DMSO, and GYY4137 (100  $\mu$ M) treatments. Cells were pre-treated with DMSO or GYY4137 2 hours before IFN treatment. *p*-value was determined by one-way ANOVA test.

f; Paired bulk RNA-seq and ATAC-seq data from GFP<sup>+</sup>Lin<sup>-</sup>c-Kit<sup>+</sup> splenocytes from *Usp18*<sup>+/-</sup> and *Usp18*<sup>+/- $\Delta$</sup>  AE9a recipients (*Top and bottom*). Increased *Ifft1* and *Plk2* expressions in GFP<sup>+</sup>Lin<sup>-</sup>c-Kit<sup>+</sup> splenocytes from *Usp18*<sup>+/- $\Delta$</sup>  AE9a recipients were also validated by qRT-PCR (*Top Right*). *p*-value was determined by two-tailed Student *t*-test.

g; H3K27ac ChIP qPCR was performed with primers in promoter/enhancer locus of *Plk2* in GFP<sup>+</sup>Lin<sup>-</sup>c-Kit<sup>+</sup> splenocytes from *Usp18*<sup>+/-</sup> and *Usp18*<sup>+/- $\Delta$</sup>  AE9a recipients. *p*-value was determined by one-way ANOVA test. All data represent mean  $\pm$  s.d, except where indicated. n.s. = not statistically significant. Source data are provided as a Source Data file.



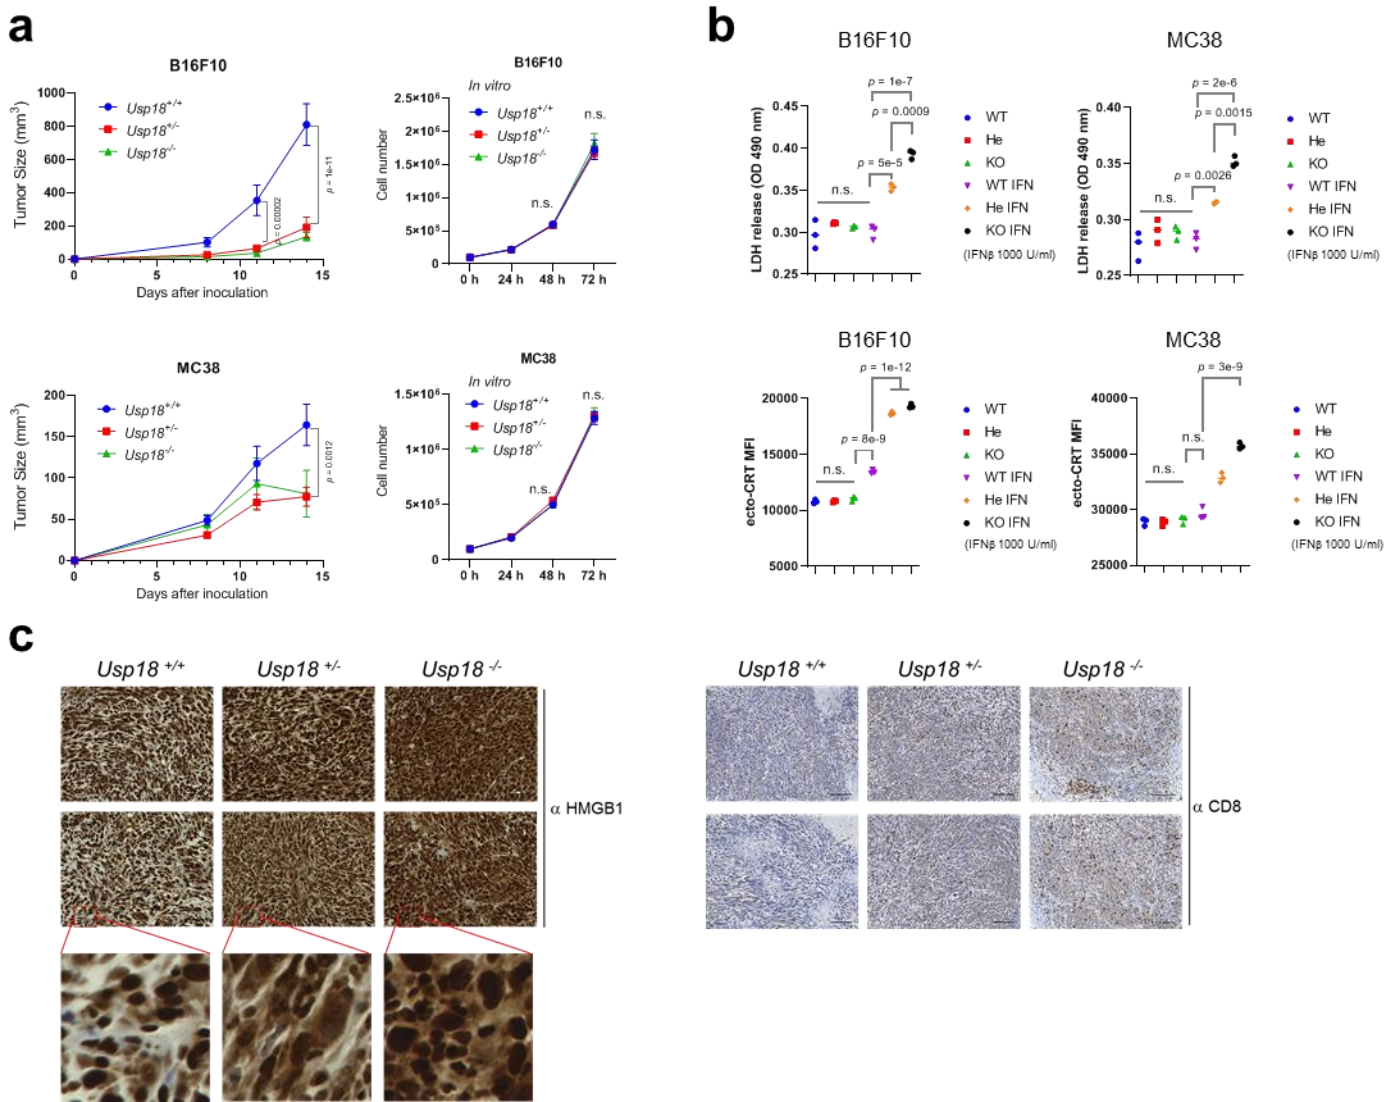

Supplementary Fig. 9

**USP18 loss delay tumorigenesis and induce ICD in solid cancer mouse models**

a; Tumor volume derived from subcutaneous injection (s.c.) of *USP18*<sup>+/+</sup> (n = 5), *USP18*<sup>+/-</sup> (n = 5), or *USP18*<sup>-/-</sup> (n = 5) B16F10 or *USP18*<sup>+/+</sup> (n = 6), *USP18*<sup>+/-</sup> (n = 5), or *USP18*<sup>-/-</sup> (n = 5) MC38 cells into C57/BL6 mice. Tumor volume were calculated from the length (a) and width (b) by using the following formula; volume (mm<sup>3</sup>) =  $ab^2/2$ . Data are presented as mean values  $\pm$  SEM. *p*-value was determined by two-way ANOVA test (*left*). Growths of these cells *in vitro* are also shown (*right*) (n = 3 independent samples each). n.s. = not statistically significant.

b; LDH release assay and MFI of surface-exposed calreticulin (ecto-CRT) of *USP18*<sup>+/+</sup>, *USP18*<sup>+/-</sup>, or *USP18*<sup>-/-</sup> B16F10 or MC38 cells treated with or without murine IFN $\beta$  (1000U/ml) for 48 hours. (n = 3 independent samples each). *p*-value was determined by one-way ANOVA test. Data are represented as mean  $\pm$  s.d, except where indicated. n.s. = not

statistically significant.

c; Immunohistochemistry analysis of tumors from *USP18*<sup>+/+</sup>, *USP18*<sup>+/-</sup>, or *USP18*<sup>-/-</sup> MC38 cells injected mice stained with either anti HMGB1 or CD8 antibody and nuclear hematoxylin staining (blue) (HMGB1; Bar = 50 μm, CD8; Bar = 100 μm).

Source data are provided as a Source Data file.

Supplementary Figure 10 (Arimoto et al)

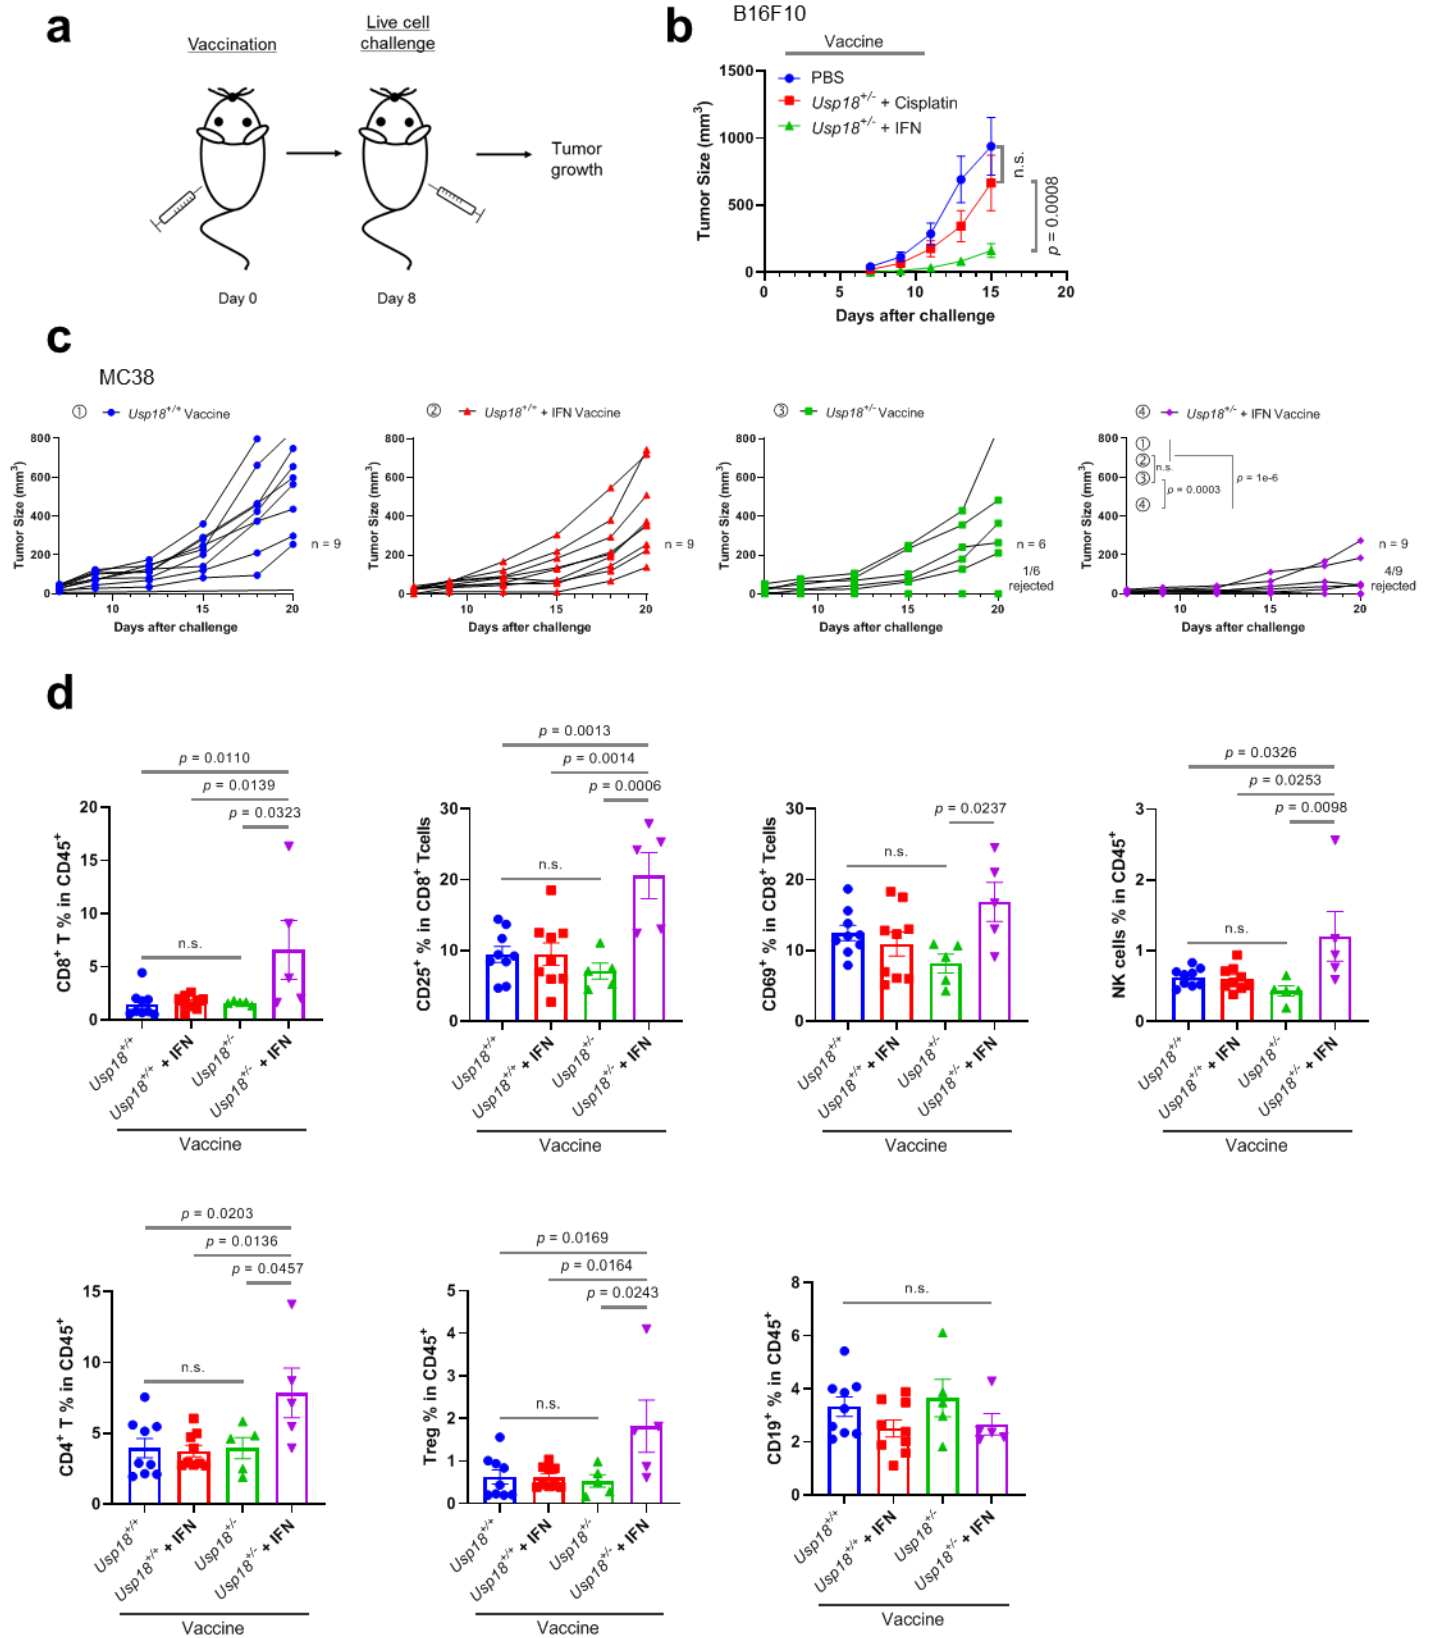

## Supplementary Fig. 10

### IFN treated USP18 depleted cancer cell vaccine induces anti-tumor response

a; A schematic depiction of the in vivo vaccination assay treatment schedule for assaying immunogenic cell death.

b; Tumor volume resulting from mice vaccinated with dying *USP18*<sup>+/-</sup> B16F10 cells via cisplatin or IFN $\beta$  treatment and subsequently challenged with live B16F10 murine melanoma cells. PBS injection was also done for control vaccination. PBS (n = 6), *USP18*<sup>+/-</sup> B16F10 + cisplatin (n = 7), *USP18*<sup>+/-</sup> B16F10 + IFN $\beta$  (n = 7). Data are presented as mean values  $\pm$ SEM. *p*-value was determined by two-way ANOVA test.

c; Tumor volume resulting from mice vaccinated with or without IFN $\beta$  treated *USP18*<sup>+/+</sup> or *USP18*<sup>+/-</sup> MC38 cells were subsequently challenged with live MC38 murine colon cancer cells. Tumor growth from all mice are shown. *USP18*<sup>+/+</sup> (n = 9), *USP18*<sup>+/+</sup> + IFN $\beta$  (n = 9), *USP18*<sup>+/-</sup> (n = 6), *USP18*<sup>+/-</sup> + IFN $\beta$  (n = 9). *p*-value was determined by two-way ANOVA test.

d; Lymphocytes infiltration in challenged tumors of (c) was analyzed by FACS. NK (CD3<sup>-</sup> NK1.1<sup>+</sup>), Treg (CD4<sup>+</sup>CD25<sup>+</sup>Foxp3<sup>+</sup>). *p*-value was determined by one-way ANOVA test.

Data are represented as mean  $\pm$  s.d, except where indicated. n.s. = not statistically significant.

Source data are provided as a Source Data file.

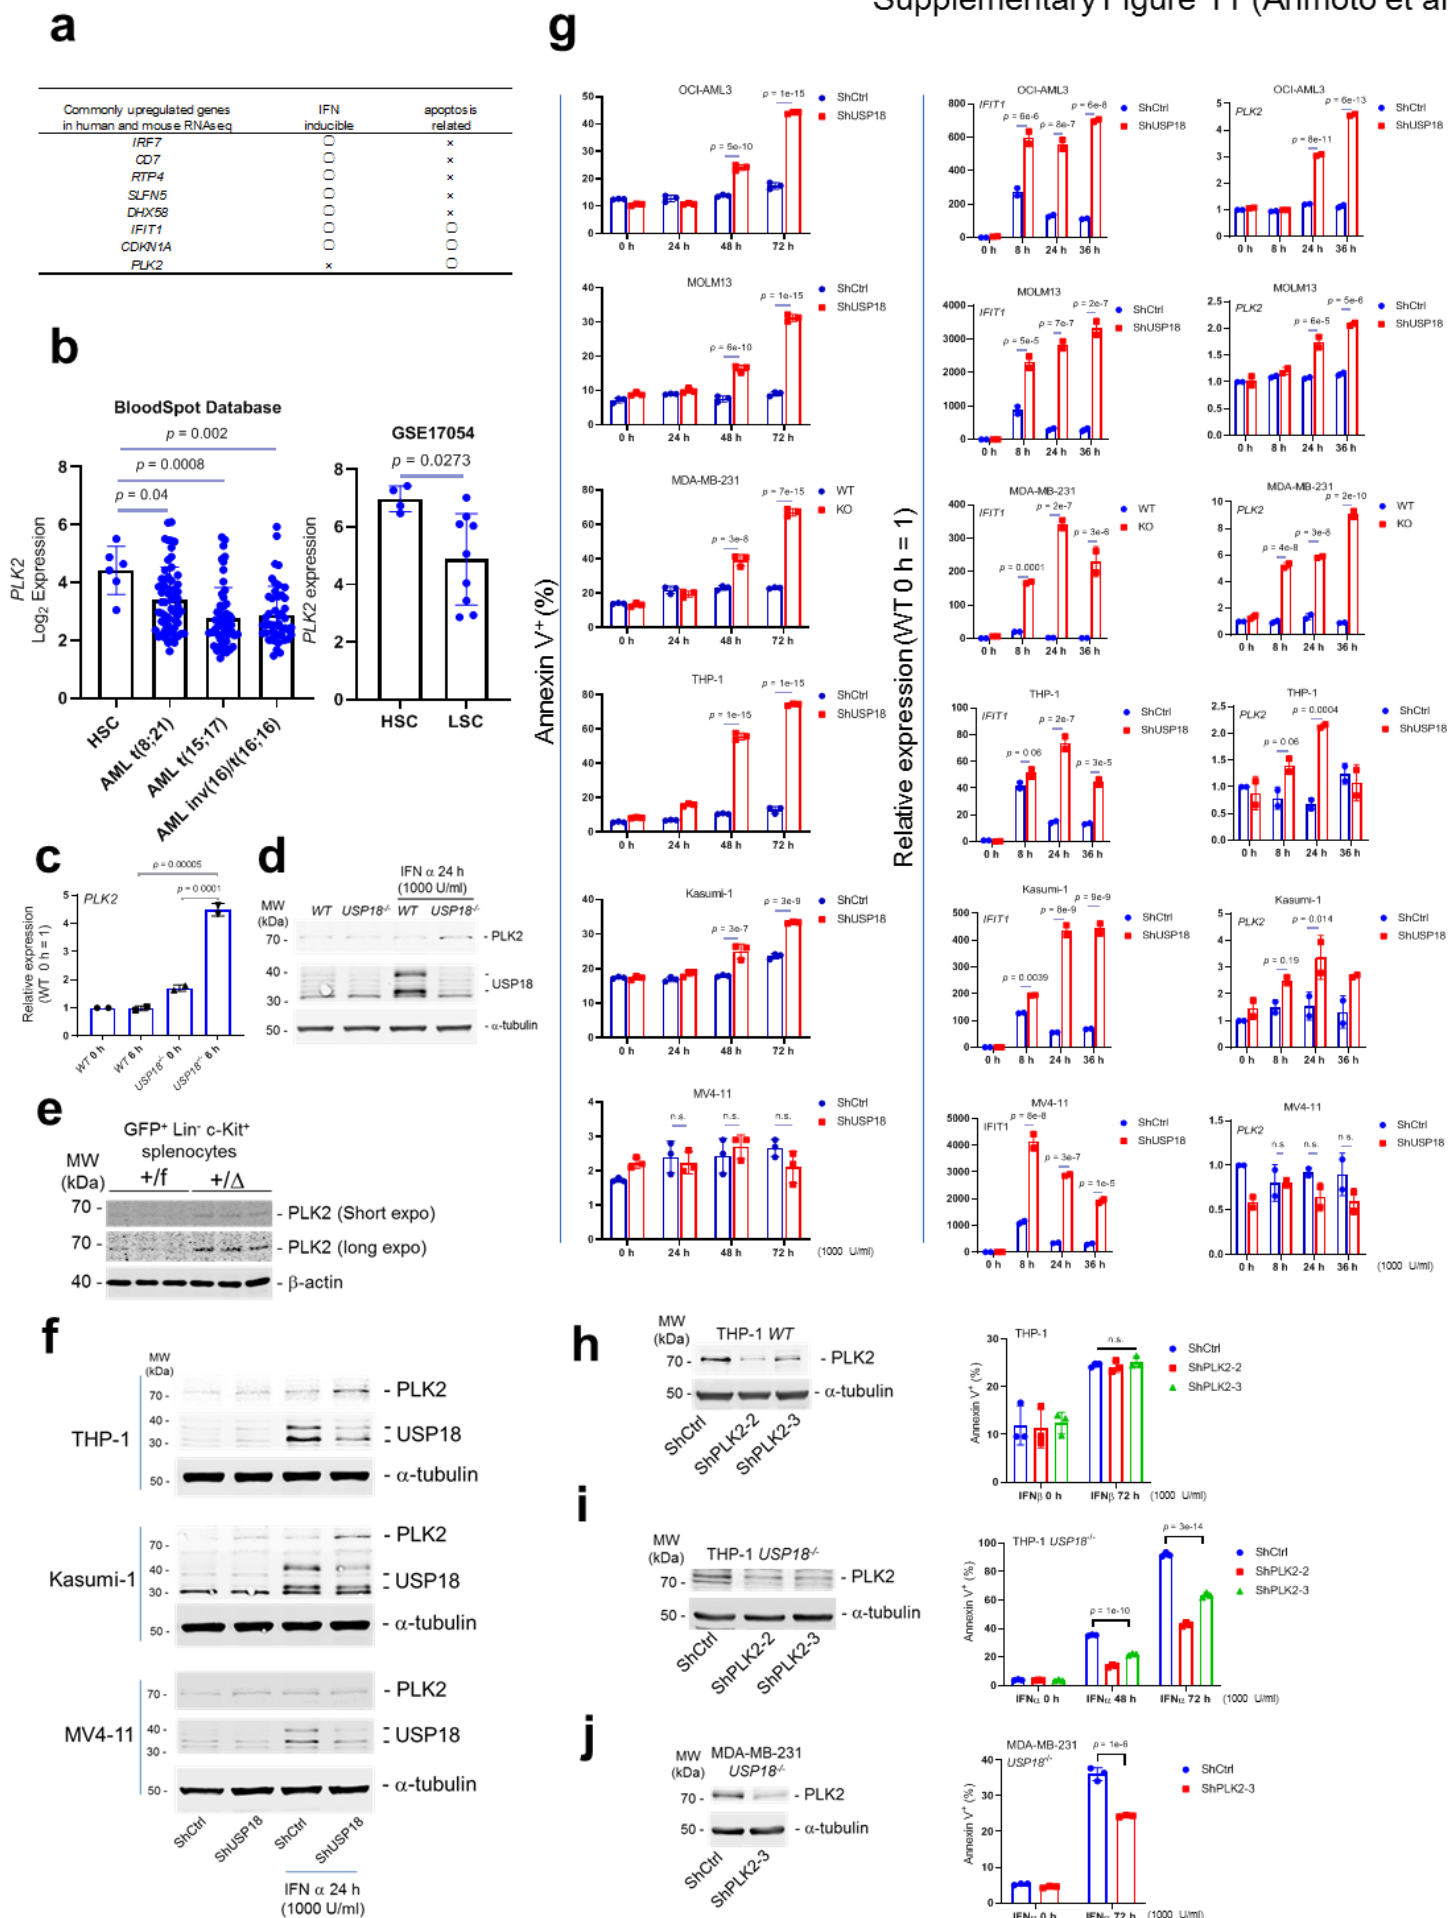

**Supplementary Fig. 11**

**PLK2 is downregulated in human AML patients and is one of the critical atypical ISGs that contributes to IFN treated USP18KD cell lethality**

a; Genes commonly upregulated (RNA-seq analysis) in *USP18*<sup>-/-</sup> + IFN human cell lines and *Usp18* knockdown murine AML cells.

b; Expression analyses of *PLK2* in healthy human hematopoietic stem cells (HSC) and AML patients (left) (n = 6, 60, 54, 47) or leukemic stem cells (n = 4, 9) (LSC) (right).

c; qRT-PCR analysis for *PLK2* in WT and *USP18*<sup>-/-</sup> THP-1 cells with or without IFN $\alpha$  (1000U/ml) treatment for 6 h (n = 3 independent samples each).

d; Western blot analysis of WT and *USP18*<sup>-/-</sup> THP-1 cells were treated with or without IFN for 36 hours.

e; Western blot analysis of sorted GFP<sup>+</sup>Lin<sup>-</sup>c-Kit<sup>+</sup> splenocytes from *Usp18*<sup>+/-</sup> and *Usp18*<sup>+Δ</sup> AE9a recipient mice (n = 3 each).

f; Western blot analysis of ShCtrl or ShUSP18 expressing THP-1, Kasumi-1, and MV4-11 cells were treated with IFN $\alpha$  (1000U/ml) for 24 hours.

g; FACS analysis of ShCtrl or ShUSP18 expressing OCI-AML3, MOLM13, MDA-MB-231, THP-1, Kasumi-1, and MV4-11 cells treated with IFN $\alpha$  (1000U/ml) for the indicated times. The same cells were treated with IFN for the indicated times. *IFIT1* and *PLK2* expression were analyzed by qRT-PCR (n = 3 independent samples each).

h; *PLK2* expression of THP-1 WT cells infected with ShCtrl, ShPLK2-2, and, ShPLK2-3 lentiviruses (*Left*). The percentage of Annexin V<sup>+</sup> cells was also measured in these cells after IFN $\beta$  (1000U/ml) treatment for the indicated times (n = 3 independent samples each) (*Right*).

i; *PLK2* expression of *USP18*<sup>-/-</sup> THP-1 cells infected with ShCtrl, ShPLK2-2, and, ShPLK2-3 lentiviruses (*Left*). The percentage of Annexin V<sup>+</sup> cells was also measured in these cells after IFN $\alpha$  (1000U/ml) treatment for the indicated times (n = 3 independent samples each) (*Right*).

j; *PLK2* expression of *USP18*<sup>-/-</sup> MDA-MB-231 cells infected with ShCtrl and ShPLK2-3 lentiviruses (*Left*) and percentage of annexin V<sup>+</sup> cells after IFN $\alpha$  (1000U/ml) treatment was analyzed by FACS (n = 3 independent samples each) (*Right*). All *p*-values in Supplementary Fig.11 were determined by one-way ANOVA test, except for 11b right (two-tailed Student *t*-test). All data represent mean  $\pm$  s.d, except where indicated. n.s. = not statistically significant. Source data are provided as a Source Data file.

**a**

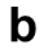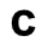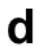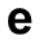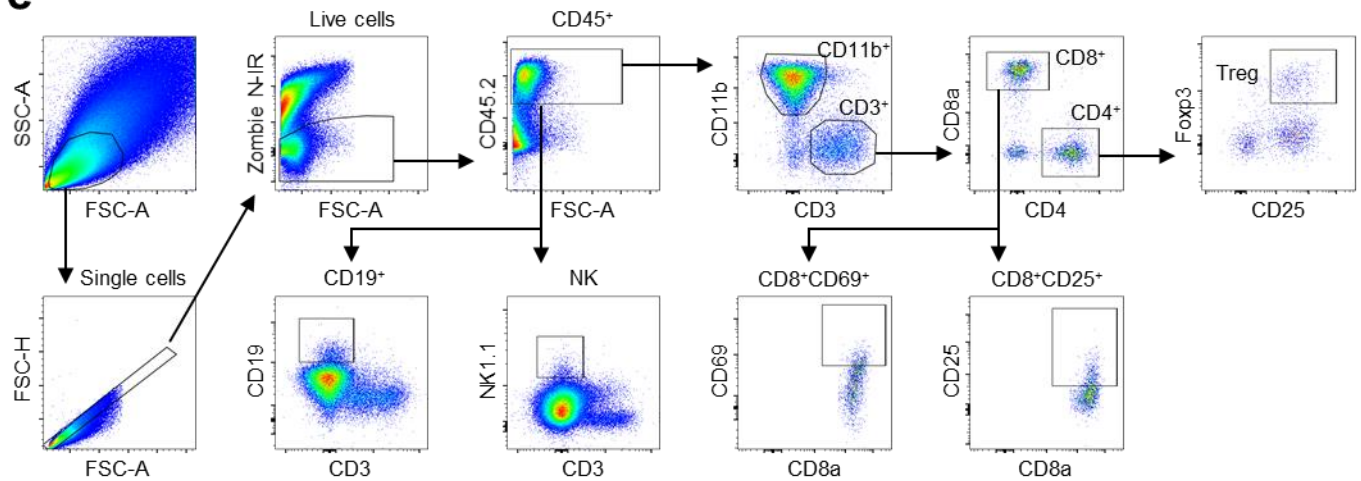

## **Supplementary Fig. 12**

### **Gating strategies in this study.**

a; Gating strategy to analyze Annexin V<sup>+</sup> cells in GFP<sup>+</sup>Lin<sup>-</sup>c-Kit<sup>+</sup>*Usp18*<sup>+/Δ</sup> leukemia cells; associated with Fig 1d.

b; Gating strategy to analyze immune populations in viable splenocytes in recipients of *Usp18*<sup>+/Δ</sup> AML cells; associated with Fig 1e.

c; Gating strategy to analyze ecto-CRT in cell lines; associated with Fig 6d, 7b, 7l, 7o, 7t, 8c, 8f and Supplementary Fig 9b.

d; Gating strategy to analyze ecto-CRT in AML cells from mice; associated with Fig 6j

e; Gating strategy to analyze tumor immune infiltrating cells to evaluate vaccine effect of dying *Usp18*<sup>+/Δ</sup> cells; associated with Supplementary Fig 10d.



Table 1 : Genotype analysis of *USP18* heterozygous intercross progeny.

|       | Genotype                    |                             |                             |      |
|-------|-----------------------------|-----------------------------|-----------------------------|------|
|       | <i>Usp18</i> <sup>+/+</sup> | <i>Usp18</i> <sup>+/-</sup> | <i>Usp18</i> <sup>-/-</sup> |      |
|       |                             |                             | Alive                       | Dead |
| E12.5 | 14                          | 24                          | 14                          | 0    |
| E13.5 | 13                          | 20                          | 6                           | 0    |
| E14.5 | 6                           | 15                          | 1* * dying                  | 6    |

*Ifnar1*<sup>-/-</sup> *Usp18*<sup>-/-</sup>; All alive

## Supplementary Table 1

Genotype analysis of *Usp18* heterozygous intercross progeny.*Usp18*<sup>-/-</sup> are embryonic lethal.

Table 2. Embryonic lethality of USP18 knockout mice is due to the blood system problem

| <i>Usp18</i> <sup>+/-</sup><br><i>CMV-Cre</i><br>x<br><i>Usp18</i> <sup>-/-</sup> (n = 43) |     |   | <i>Usp18</i> <sup>+/-</sup><br><i>Vav-iCre</i><br>x<br><i>Usp18</i> <sup>-/-</sup> (n = 34) |     |   | <i>Usp18</i> <sup>+/-</sup><br><i>UBC<sup>ER</sup>-Cre</i><br>x<br><i>Usp18</i> <sup>-/-</sup> (n = 32) |     |   |
|--------------------------------------------------------------------------------------------|-----|---|---------------------------------------------------------------------------------------------|-----|---|---------------------------------------------------------------------------------------------------------|-----|---|
| <i>CMV-Cre</i> -                                                                           |     |   | <i>Vav-iCre</i> -                                                                           |     |   | <i>UBC<sup>ER</sup>-Cre</i> -                                                                           |     |   |
|                                                                                            | f/f | 9 |                                                                                             | f/f | 4 |                                                                                                         | f/f | 4 |
|                                                                                            | -/f | 4 |                                                                                             | -/f | 2 |                                                                                                         | -/f | 6 |
|                                                                                            | +/f | 6 |                                                                                             | +/f | 9 |                                                                                                         | +/f | 3 |
|                                                                                            | +/- | 7 |                                                                                             | +/- | 6 |                                                                                                         | +/- | 3 |
| <i>CMV-Cre</i> +                                                                           |     |   | <i>Vav-iCre</i> +                                                                           |     |   | <i>UBC<sup>ER</sup>-Cre</i> +                                                                           |     |   |
|                                                                                            | f/f | 0 |                                                                                             | f/f | 0 |                                                                                                         | f/f | 7 |
|                                                                                            | -/f | 0 |                                                                                             | -/f | 0 |                                                                                                         | -/f | 3 |
|                                                                                            | +/f | 8 |                                                                                             | +/f | 5 |                                                                                                         | +/f | 1 |
|                                                                                            | +/- | 9 |                                                                                             | +/- | 8 |                                                                                                         | +/- | 5 |

## Supplementary Table 2

**Embryonic lethality of *Usp18* deficient mice is due to the blood system problem.**

Survival of *Usp18*<sup>f/f</sup>, *-/f*, *+/f*, or *+/-* *CMV-Cre*<sup>- or +</sup> (n = 43), *Vav-iCre*<sup>- or +</sup> (n = 34), and *UBC<sup>ER</sup>-Cre*<sup>- or +</sup> (n = 32) mice were examined.

Table 3. *Usp18* depletion in mice leads to leukopenia like phenotype

| Hematological Values        | <i>Usp18</i> <sup>flf</sup> | <i>Usp18</i> <sup>Δ/Δ</sup> | <i>Usp18</i> <sup>-lf</sup> | <i>Usp18</i> <sup>-lΔ</sup> |
|-----------------------------|-----------------------------|-----------------------------|-----------------------------|-----------------------------|
| WBC (x 10 <sup>3</sup> /μl) | 6.5±1.2                     | 1.6±0.4                     | 8.5±1.2                     | 2.7±1.7                     |
| NE (x 10 <sup>3</sup> /μl)  | 1.5±0.2                     | 0.4±0.0                     | 2.0±0.1                     | 0.7±0.4                     |
| LY (x 10 <sup>3</sup> /μl)  | 4.7±1.1                     | 1.0±0.4                     | 6.1±1.3                     | 1.4±1.6                     |
| MO (x 10 <sup>3</sup> /μl)  | 0.3±0.2                     | 0.1±0.0                     | 0.3±0.0                     | 0.1±0.1                     |
| EO (x 10 <sup>3</sup> /μl)  | 0.03±0.02                   | 0.04±0.04                   | 0.11±0.07                   | 0.09±0.06                   |
| BA (x 10 <sup>3</sup> /μl)  | 0.01±0.01                   | 0.01±0.01                   | 0.01±0.01                   | 0.01±0.00                   |
| RBC(x 10 <sup>6</sup> /μl)  | 9.7±0.8                     | 10.0±1.2                    | 9.3±0.4                     | 9.5±0.4                     |
| HB (g/dL)                   | 12.0±0.7                    | 13.6±1.7                    | 11.6±0.9                    | 11.6±0.7                    |
| HCT (%)                     | 48.3±5.0                    | 55.3±8.0                    | 44.8±1.3                    | 45.9±2.7                    |
| MCV (fl)                    | 49.5±1.7                    | 50.8±2.1                    | 48.4±0.8                    | 48.5±0.9                    |
| MCH (pg)                    | 12.3±0.6                    | 12.5±0.4                    | 12.5±1.4                    | 12.3±1.2                    |
| MCHC (%)                    | 24.9±1.2                    | 24.6±0.6                    | 25.8±2.5                    | 25.5±3.0                    |
| PLT (x 10 <sup>3</sup> /μl) | 2336.3±171.8                | 1462±323.7                  | 1811.0±363.4                | 1473.0±432.4                |
| <i>n</i>                    | 3                           | 3                           | 3                           | 3                           |

WBC (x 10<sup>3</sup>/ μ l) : White blood cells

NE (x 10<sup>3</sup>/ μ l) : Neutrophils

LY (x 10<sup>3</sup>/ μ l) : Lymphocytes

MO (x 10<sup>3</sup>/ μ l) : Monocytes

EO (x 10<sup>3</sup>/ μ l) : Eosinophils

BA (x 10<sup>3</sup>/ μ l) : Basophils

RBC (x 10<sup>6</sup>/ μ l) : Red blood cells

HB (g/dL) : Hemoglobin

HCT (%) : Hematocrit

MCV (fl) : Mean corpuscular volume

MCH (pg) : Mean corpuscular hemoglobin

MCHC (%) : Mean corpuscular hemoglobin concentration

PLT (x 10<sup>3</sup>/ μ l) : Platelets

### Supplementary Table 3

#### *Usp18* deletion in mice leads to leukopenia like phenotype.

Peripheral blood counts were analyzed at day 5 for *Usp18*<sup>flf</sup>, *Usp18*<sup>flf</sup> *UBC<sup>ER</sup>-Cre*, *Usp18*<sup>-lf</sup> *UBC<sup>ER</sup>-Cre*, and *Usp18*<sup>-lf</sup> *UBC<sup>ER</sup>-Cre* mice after 3 consecutive times tamoxifen injection.

Data are the mean ± s.d.; n=3 per genotype.

Table 4. Guide RNA sequence primers

| USP18 gRNA  |                                                                        |
|-------------|------------------------------------------------------------------------|
| Primers     | Sequence                                                               |
| gRNA set1   | F:5'-CACCGAAGTCGTGCTGTCCTGAACG-3'<br>R:5'-AAACCGTTCAGGACAGCAGACTTC-3'  |
| gRNA set2   | F:5'-CACCGAGCAGCCCAGAGCGTCCC-3'<br>R:5'-AAACGGGACGCTCTCTGGGCTGCTC-3'   |
| mUsp18 gRNA |                                                                        |
| Primers     | Sequence                                                               |
| gRNA set1   | F:5'-CACCGTGCCAGAGGACGACTGGTTA-3'<br>F:5'-AAACTAACCCAGTCGTCTCTGGCAC-3' |
| gRNA set2   | F:5'-CACCGGCCCGCAGCAGTACTCAGCGC-3'<br>F:5'-AAACGCGCTGAGTACTGTGCGGCC-3' |
| PLK2 sgRNA  |                                                                        |
| Primers     | Sequence                                                               |
| gRNA set    | F:5'-CACCGACGATAATCCGCGAGATCTC-3'<br>F:5'-AAACGAGATCTCGCGGATTATCGTC-3' |
| GSDMD sgRNA |                                                                        |
| Primers     | Sequence                                                               |
| gRNA set1   | F:5'-CACCGTGGGTCCCTGCACACGCTC-3'<br>F:5'-AAACGAGCGTGCTGCAGGGACCCAC-3'  |
| gRNA set2   | F:5'-CACCGGAGCCGGATGCCGCGGAACC-3'<br>F:5'-AAACGGTTCCGCGGCATCCGGCTCC-3' |
| GSDME sgRNA |                                                                        |
| Primers     | Sequence                                                               |
| gRNA set    | F:5'-CACCGGAAGACCAATTTCCGAGTCC-3'<br>F:5'-AAACGGAATCGGAAATTGGTCTTCC-3' |

**Supplementary Table 4****Guide RNA sequence primers**

Information for guide RNA sequences for Crispr in this study.

Table 5. RT-qPCR primers

| RT qPCR primers 5'-3' for murine genes |                                                                  | RT qPCR primers 5'-3' for human genes |                                                                   |
|----------------------------------------|------------------------------------------------------------------|---------------------------------------|-------------------------------------------------------------------|
| Primers                                | Sequence                                                         | Primers                               | Sequence                                                          |
| <i>Isg15</i>                           | F:5'-GACTAACTCCATGACGGTG-3'<br>R:5'-AACTGGTCTTCGTGACTTG-3'       | <i>IFIT1</i>                          | F:5'-AAGGCAGGCTGTCCGCTTA-3'<br>R:5'-TCCTGTCTTCATCCTGAAGCT-3'      |
| <i>Ifit1</i>                           | F:5'-TGGCGACCTGGGCAACTGTG-3'<br>R:5'-TGGGCTGCCTGTTTCGGGATGTC-3'  | <i>PLK2</i>                           | F:5'-GACCCTATGGGACTCCTCTTT-3'<br>R:5'-GTATGCCTTAGCCTGTTCTGG-3'    |
| <i>Irf7</i>                            | F:5'-CAGCGAGTGCTGTTGGAGAC-3'<br>R:5'-AAGTTCGTACACCTTATGCCG-3'    | <i>FPR1</i>                           | F:5'-CCTCCACTTTGCCATTG-3'<br>R:5'-AGCAGAGCCATCACCC-3'             |
| <i>Oasl2</i>                           | F:5'-TTGTGCGGAGGATCAGGTA-3'<br>R:5'-TGATGGTGTGCGAGTCTTTGA-3'     | <i>SGK1</i>                           | F:5'-GACAGGACTGTGGACTGGTG-3'<br>R:5'-TTTCAGCTGTGTTTCGGCTA-3'      |
| <i>Dhx58</i>                           | F:5'-CCAGAAAGACCAGCAGGAAG-3'<br>R:5'-TTGCACTGAGCGATATCCAG-3'     | <i>CCL4L2</i>                         | F:5'-AAAACCTCTTTGCCACCAATACC-3'<br>R:5'-GAGAGCAGAAGGCAGCTACTAG-3' |
| <i>Rtp4</i>                            | F:5'-GGAGCCTGCATTGATAAG-3'<br>R:5'-TTCTGCAGCATCTGGAACAC-3'       | <i>GAPDH</i>                          | F:5'-GCCAAAAGGGTCATCATCT-3'<br>R:5'-ATGGATGACCTTGCCAG-3'          |
| <i>Xaf1</i>                            | F:5'-GCCTGCGCTTCATAGTCCTTT-3'<br>R:5'-GGTGCACAACTTCCATGTGCT-3'   |                                       |                                                                   |
| <i>Plk2</i>                            | F:5'-CATCACCACCATTCCTACT-3'<br>R:5'-TCGTAACACTTTGCAAATCCA-3'     |                                       |                                                                   |
| <i>Cd80</i>                            | F:5'-ACCCCAACATAACTGAGTCT-3'<br>R:5'-TTCCAACCAAGAGAAGCGAGG-3'    |                                       |                                                                   |
| <i>Cdkn1a</i>                          | F:5'-CTGGGAGGGGACAAGAG-3'<br>R:5'-GCTTGAGTGATAGAAATCTG-3'        |                                       |                                                                   |
| <i>Zmat3</i>                           | F:5'-GACTCGGAAAGAAGGGAGTG-3'<br>R:5'-AGTAAGGGCCTGAATTGCTC-3'     |                                       |                                                                   |
| <i>Eda2r</i>                           | F:5'-CACACTGCATAGTCTGCCCTC-3'<br>R:5'-GCCTTCTGGACCCGATTGA-3'     |                                       |                                                                   |
| <i>Tnfrsf4</i>                         | F:5'-GTTCTGCACCTCCATAGTTTGA-3'<br>R:5'-GGATGCTTCTGTGCTTCATCT-3'  |                                       |                                                                   |
| <i>Slfn5</i>                           | F:5'-TTCTGCTGTGCGGTGTTTGCCA-3'<br>R:5'-CTGGAGAACCATCTCAGGACAC-3' |                                       |                                                                   |
| <i>Cxcl9</i>                           | F:5'-TCCTTTTGGGCATCATCTTCC-3'<br>R:5'-TTTGTAGTGGATCGTGCCCTCG-3'  |                                       |                                                                   |
| <i>Gapdh</i>                           | F:5'-AAGGTCATCCAGAGCTGAA-3'<br>R:5'-CTGCTTCACCACTTCTTGA-3'       |                                       |                                                                   |

## Supplementary Table 5

## RT-qPCR primers

Information for RT-qPCR primers in this study.

Table 6. Primers for ChIP-qPCR

| IRF9 ChIP qPCR    |                                                                          |
|-------------------|--------------------------------------------------------------------------|
| Primers           | Sequence                                                                 |
| SGK1              | F: 5'-TGAGAATTGCCACCA TGCCCCTCAT-3'<br>R: 5'-AGCATACGCCGAGCCGGTCTTTGA-3' |
| PLK2              | F: 5'-GTGTCTCAAA TACTTCCAGCA-3'<br>R: 5'-TGGA CTTGCCCTGCA CTCTTTA-3'     |
| CCL4L2            | F: 5'-AAGCCA CTGTAGCA GGTGT-3'<br>R: 5'-CA GGGCGA TGTCATCA TA-3'         |
| p65 ChIP qPCR     |                                                                          |
| Primers           | Sequence                                                                 |
| SGK1              | F: 5'-TCAAAGACCGGCTCGGCGTAT-3'<br>R: 5'-AAGGGCGGGGCCACTTCTCACTGT-3'      |
| PLK2              | F: 5'-GTCTTTGCTGTCACTTCCGT-3'<br>R: 5'-CTTATTCATCCCTGACAACTCT-3'         |
| CCL4L2            | F: 5'-ACTCCTCACTCAGCTAGCTT-3'<br>R: 5'-CTCTGAGGCCTAGGACAAAT-3'           |
| H3K27ac ChIP qPCR |                                                                          |
| Primers           | Sequence                                                                 |
| Plk2 Pr3          | F: 5'-ATTGGGATTCGGGCACTAAAGTC-3'<br>F: 5'-GTTCTACCAAAAAGATACAGGC-3'      |
| Plk2 Pr5          | F: 5'-TTCCGCAAGGCCGGCCACTGA-3'<br>F: 5'-TGCCCTGACTTTGGACGT-3'            |

**Supplementary Table 6****Primers for ChIP-qPCR**

Information for ChIP-qPCR primers in this study.
